# Supplementary material for: How effective is community physical activity promotion in areas of deprivation for inactive adults with cardiovascular disease risk and/or mental health concerns? Study protocol for a pragmatic observational evaluation of the ‘Active Herts’ physical activity programme
Source: PubMed Central journal article supplement — BMJ Open. 2017 Nov 25;7(11):e017783. doi: 10.1136/bmjopen-2017-017783 (PMC5719296; doi:10.1136/bmjopen-2017-017783), 2017-11-25
Supplement: bmjopen-2017-017783.draft_revisions.pdf [file bmjopen-2017-017783.draft_revisions.pdf]

# BMJ Open

BMJ Open is committed to open peer review. As part of this commitment we make the peer review history of every article we publish publicly available.

When an article is published we post the peer reviewers' comments and the authors' responses online. We also post the versions of the paper that were used during peer review. These are the versions that the peer review comments apply to.

The versions of the paper that follow are the versions that were submitted during the peer review process. They are not the versions of record or the final published versions. They should not be cited or distributed as the published version of this manuscript.

BMJ Open is an open access journal and the full, final, typeset and author-corrected version of record of the manuscript is available on our site with no access controls, subscription charges or pay-per-view fees (<http://bmjopen.bmj.com>).

If you have any questions on BMJ Open's open peer review process please email [editorial.bmjopen@bmj.com](mailto:editorial.bmjopen@bmj.com)

# BMJ Open

## Physical activity promotion in areas of deprivation for inactive adults with CVD risk: Study protocol for a pragmatic evaluation of 'Active Herts' a community physical activity programme

|                                 |                                                                                                                                                                                                                                                                                                                                                             |
|---------------------------------|-------------------------------------------------------------------------------------------------------------------------------------------------------------------------------------------------------------------------------------------------------------------------------------------------------------------------------------------------------------|
| Journal:                        | <i>BMJ Open</i>                                                                                                                                                                                                                                                                                                                                             |
| Manuscript ID                   | bmjopen-2017-017783                                                                                                                                                                                                                                                                                                                                         |
| Article Type:                   | Protocol                                                                                                                                                                                                                                                                                                                                                    |
| Date Submitted by the Author:   | 16-May-2017                                                                                                                                                                                                                                                                                                                                                 |
| Complete List of Authors:       | Howlett, Neil; University of Hertfordshire, Department of Psychology and Sport Sciences<br>Jones, Andrew; University of East Anglia, Norwich Medical School<br>Bain, Lucy; University of East Anglia Faculty of Medicine and Health Sciences, Norwich Medical School<br>Chater, Angel; University of Bedfordshire, Department of Sport Science and Physical |
| <b>Primary Subject Heading</b>: | Public health                                                                                                                                                                                                                                                                                                                                               |
| Secondary Subject Heading:      | Sports and exercise medicine                                                                                                                                                                                                                                                                                                                                |
| Keywords:                       | physical activity programme, behaviour change, inactive adults, behaviour change techniques, COM-B                                                                                                                                                                                                                                                          |
|                                 |                                                                                                                                                                                                                                                                                                                                                             |

SCHOLARONE™  
Manuscripts

Only

1  
2  
3  
4  
5  
6 **Physical activity promotion in areas of deprivation for inactive adults with CVD risk: Study**  
7  
8 **protocol for a pragmatic evaluation of 'Active Herts' a community physical activity**  
9  
10 **programme**  
11  
12  
13  
14  
15  
16

17 Neil Howlett<sup>1\*</sup>, Andy Jones<sup>2</sup>, Lucy Bain<sup>2</sup>, Angel Chater<sup>3</sup>  
18  
19  
20  
21  
22

23 <sup>1</sup>Department of Psychology and Sport Sciences, University of Hertfordshire, College Lane,  
24 Hatfield, Herts, AL10 9AB, UK  
25  
26  
27

28 <sup>2</sup>Norwich Medical School, University of East Anglia, Norwich, NR4 7TJ, UK  
29  
30

31 <sup>3</sup>Institute for Sport and Physical Activity Research (ISPAR), University of Bedfordshire,  
32 Polhill Avenue, Bedford, MK41 9EA, UK  
33  
34  
35  
36  
37  
38  
39

40 \*Corresponding author  
41

42 Email: [n.howlett@herts.ac.uk](mailto:n.howlett@herts.ac.uk); Tel: 01707 285971  
43  
44  
45  
46  
47  
48  
49  
50  
51  
52  
53  
54  
55  
56  
57  
58  
59  
60

## **Abstract**

### **Introduction**

There is a high prevalence of inactive adults in the UK, and many suffer from conditions such as cardiovascular disease or poor mental health. These co-exist more frequently in areas of higher socio-economic deprivation. There is a need to test the effectiveness, acceptability, and sustainability of physical activity programmes. Active Herts uses novel evidence-based behaviour change techniques to target physical inactivity.

### **Methods and analysis**

Active Herts is a community physical activity programme for inactive adults aged 16+ with one or more risk factors for CVD and/or a mild to moderate mental health condition. This evaluation will follow a mixed-methods longitudinal (baseline, and 3, 6 and 12 month follow-ups) design. Pragmatic considerations mean delivery of the programme differs by locality. In two areas programme users will receive a behaviour change technique booklet, regular consultations, a booster phone call, motivational text messages, and signposting to 12 weeks of exercise classes. In another two areas programme users will also receive 12 weeks of free tailored exercise classes, with optional exercise 'buddies' available. An outcome evaluation will assess changes in physical activity as the primary outcome, and sporting participation, sitting, wellbeing, psychological capability, and reflective motivation as secondary outcomes. A process evaluation will explore the views of stakeholders, delivery staff, and programme leads. Economic evaluation will examine the programme costs against the benefits gained in terms of reduced risk of morbidity.

### **Ethics and dissemination**

1  
2  
3 This study was been approved by the Faculty of Medicine and Health Sciences  
4  
5 Research Ethics Committee at University of East Anglia. Informed written consent will be  
6  
7 obtained from programme users in the evaluation. Results will be published in peer-  
8  
9 reviewed journals, presented at conferences, and shared through the study website and  
10  
11 local community outlets.  
12  
13

#### 14 15 **Registration**

16  
17  
18 Clinicaltrials.gov ID number: NCT03153098  
19  
20  
21  
22  
23  
24

25 **Keywords:** Physical activity programme; behaviour change; inactive adults; behaviour  
26  
27 change techniques; COM-B  
28  
29  
30  
31  
32  
33  
34  
35  
36  
37  
38  
39  
40  
41  
42  
43  
44  
45  
46  
47  
48  
49  
50  
51  
52  
53  
54  
55  
56  
57  
58  
59  
60

### Strengths and Limitations

- The Active Herts programme is designed with the latest behaviour change theory and techniques in both the materials for programme users and the training for delivery staff.
- This evaluation will provide a unique contribution by being the first to evaluate the use of a novel combination of behaviour change techniques and to evaluate the effect of this physical activity programme on key behavioural drivers.
- The main limitation is that due to pragmatic considerations participants will receive the two different delivery approaches based on their place of residence and not through randomisation.
- A secondary limitation is that due to financial constraints and the scale of recruitment (aiming for maximum reach) it is not possible to evaluate an objective measure of physical activity.

1  
2  
3 **Physical activity promotion in areas of deprivation for inactive adults with CVD risk: Study**  
4  
5 **protocol for a pragmatic evaluation of 'Active Herts' a community physical activity**  
6  
7  
8 **programme**  
9

10  
11 **Introduction**  
12

13  
14 Physical inactivity is responsible for 6% of deaths globally, making it the fourth  
15 leading risk factor for mortality world-wide [1]. Being active is protective against  
16 cardiovascular disease (CVD), type 2 diabetes, and cancer [2-3], with strong evidence that  
17 exercise is an effective treatment for depression [4]. In England, 63% of men and 59% of  
18 women report participating in the recommended weekly levels of 150 minutes of moderate  
19 to vigorous physical activity [5], yet objectively-measured data suggest just 6% of men and  
20 4% of women meet this level [6]. Further, only 34% of men and 24% of women meet the  
21 guidelines for muscle-strengthening exercises on two or more days per week [7]. The Active  
22 People Survey from Sport England in 2015-16 found that only 36% of adults (41% of men  
23 and 32% of women) report taking part in sport once a week, with the figure decreasing to  
24 18% for sporting participation on three or more occasions weekly.  
25  
26  
27  
28  
29  
30  
31  
32  
33  
34  
35  
36  
37  
38  
39

40 Overall physical activity and sporting participation needs to be improved in the UK,  
41 but inactivity is even more prevalent in low-socioeconomic status (SES) adults and those  
42 suffering from major disease. Lower SES adults are less likely to participate in vigorous and  
43 moderate-intensity physical activity, and walking [8]. They are also more likely to perceive  
44 the opportunities to be active in their local environment more negatively shown through  
45 physical activity related factors such as attractiveness, safety, and how congested roads are  
46 [8]. Furthermore, lower SES adults are also less likely to perceive themselves as overweight  
47 or try to lose weight, which in turn lessens the chances of them participating in physical  
48  
49  
50  
51  
52  
53  
54  
55  
56  
57  
58  
59  
60

1  
2  
3 activity as a weight control strategy [9]. Additionally, those suffering from CVD and a  
4  
5 combination of CVD and type 2 diabetes report lower levels of physical activity and greater  
6  
7 sedentary behaviour in terms of television watching [10]. Overall, those living in low SES  
8  
9 areas and/or with ongoing diseases are an important target to increase physical activity  
10  
11 through intervention.  
12  
13

14  
15 The Active Herts programme will attempt to address adult inactivity by drawing on  
16  
17 the latest evidence analysing how to support inactive adults to be more physically active. A  
18  
19 recent systematic review has shown that interventions in inactive adults show statistically  
20  
21 significant small to moderate effect sizes post-intervention and small but still statistically  
22  
23 significant effect sizes for at least six months after intervention contact has finished (follow-  
24  
25 up) [11-12]. This review also analysed the behaviour change techniques [BCT; 13] that were  
26  
27 associated with effective interventions and highlighted several approaches that can be used  
28  
29 to heighten the likelihood of programmes and interventions producing meaningful changes  
30  
31 in physical activity. It was found practising the performance of physical activity and gradually  
32  
33 increasing its intensity were effective for physical activity change at both post-participation  
34  
35 and follow-up. Additionally, post-participation effectiveness was associated with being  
36  
37 shown how to be more active and 'Biofeedback' (using heart rate monitors to judge exercise  
38  
39 intensity), and effectiveness at follow-up was associated with creating detailed plans to be  
40  
41 active, receiving instructions on particular exercises (this may include during exercise  
42  
43 classes), rewarding oneself for progress, and utilising prompts or cues to exercise [11].  
44  
45  
46  
47  
48  
49

50  
51 Whilst understanding which techniques are effective when attempting to intervene  
52  
53 with an inactive population to increase physical activity is important, so too is the  
54  
55 communication style in which the techniques are delivered [14]. Motivational interviewing  
56  
57 has been shown to be an effective communication method with which to change several  
58  
59  
60



1  
2  
3 health behaviours including physical activity (e.g. [15]). Used in combination, BCTs and  
4  
5 motivational interviewing can target key determinants of behaviour, which can be  
6  
7 understood in terms of the individual's Capability (physical and psychological), Opportunity  
8  
9 (social and physical), and Motivation (reflective and automatic) (COM-B: [16]) to be more  
10  
11 active. The selected BCTs in this programme can be mapped onto and, therefore, target all  
12  
13 six aspects of the COM-B (17). Research has shown that the COM-B model explains a large  
14  
15 amount of variance in physical activity participation, highlighting psychological capability  
16  
17 and reflective motivation as key drivers [18]. In this work, psychological capability was  
18  
19 formed of components such as action planning and self-monitoring, and reflective  
20  
21 motivation were formed of components such as intentions and self-efficacy [18].  
22  
23  
24  
25  
26

27 The purpose of the Active Herts programme is to support engagement in physical  
28  
29 activity and promote wellbeing in inactive adults with elevated risk of CVD and/or mental  
30  
31 health concerns living in four areas of the English county of Hertfordshire where need is the  
32  
33 highest. Pragmatic delivery considerations mean the programme will use two different  
34  
35 approaches, with each being delivered in two different localities. The first will provide  
36  
37 programme users with an initial consultation, followed by 12 weeks of exercise sessions,  
38  
39 and further support in person or by phone throughout a 12-month period ('standard  
40  
41 delivery'). The second approach will include additional support in the form of optional  
42  
43 exercise buddies and free tailored exercise organised by the programme staff themselves  
44  
45 ('enhanced delivery'). The aim of this paper is to report the Active Herts programme  
46  
47 methods in terms of their content, delivery, staff training, and evaluation. The objectives of  
48  
49 the evaluation are:  
50  
51  
52  
53  
54

55 Primary objective:  
56  
57  
58  
59  
60

- 1  
2  
3 - To observe whether the Active Herts programme increases physical activity with  
4  
5 (enhanced delivery) and without (standard delivery) additional support from exercise  
6  
7 buddies and free access to tailored exercise classes.  
8  
9

10  
11 Secondary objectives:

- 12  
13  
14 - To observe whether the Active Herts programme increases health and mental well-  
15  
16 being with (enhanced delivery) and without (standard delivery) additional support  
17  
18 from exercise buddies and tailored exercise classes.  
19  
20  
21 - To explore the relative cost-effectiveness of the two delivery approaches.  
22  
23  
24 - To explore which components from the two different delivery approaches are  
25  
26 particular drivers of their effectiveness and what the barriers may be that prevent  
27  
28 these models from achieving their potential.  
29  
30

## 31 **Methods and Analysis**

### 32 **Design**

33  
34  
35  
36  
37 This evaluation includes a qualitative process evaluation and an outcome evaluation.  
38  
39 The quantitative study will follow a longitudinal (baseline, and 3, 6 and 12 month follow-  
40  
41 ups) observational design, with comparison of the two different delivery methods employed  
42  
43 in different localities. The design of the evaluation is illustrated in Figure 1. This protocol is  
44  
45 reported according to the Transparent Reporting of Evaluations with Nonrandomized  
46  
47 Designs (TREND; [19]) guidelines and with reference to the Template for Intervention  
48  
49 Description and Replication (TIDieR; [20]) checklist.  
50  
51  
52  
53  
54

55 *Insert figure 1 about here*  
56  
57  
58  
59  
60

### Programme users

The inclusion criteria for participation in the Active Herts programme are inactive adults aged 16 and over who have one or more risk factors for CVD. Inactivity is classed as participating in less than one episode of 30 minutes of physical activity per week on a regular basis. Additional risk factors for CVD include: diabetes, hypertension, high cholesterol, obesity (BMI > 30 or BMI > 28 if one or more co-morbidities) and/or smoking. Programme users who are inactive with a mild to moderate mental health condition may also take part. Those with a severe mental health condition can do so if their general practitioner (GP), Mind (a mental health charity), or Improving Access to Psychological Therapies (IAPT) consultant deems them suitable for the programme. An additional criterion for inclusion in the evaluation was the ability to give informed consent for their data to be used.

Eligible adults will live in one of four Hertfordshire districts (Broxbourne, Stevenage, Hertsmere, and Watford). The wider economic value for health from sport participation in Hertfordshire is £461.6 million. Inactivity (excluding costs related to obesity and mental health) is also costing the health economy between £1.1 and £1.4 million per year in the four focus districts of Active Herts. The districts contain the highest number of deprived Lower Super Output Areas (LSOA) in Hertfordshire and are in the five highest rates of under 75 mortality rate from CVD (2-3%), adult obesity (8-10%), and diabetes (4-6%). A life expectancy gap of 6-9.6 years exists between the most and least deprived areas across these districts [21]. Less than 50% of this population participate in 30 minutes of physical activity once per week.

1  
2  
3 Programme users will be primarily recruited into the programme through 23 GP  
4  
5 services throughout the four localities: five in Broxbourne; five in Hertsmere; seven in  
6  
7 Stevenage; six in Watford. A Mind wellbeing centre in each location will also refer into the  
8  
9 programme. Hertfordshire residents who meet the inclusion criteria can also access the  
10  
11 programme through self-referral. As this programme is Sport England and local authority  
12  
13 funded with a focus on delivery, power calculations were not deemed necessary and all  
14  
15 eligible programme users are invited to engage in the evaluation. The objective is to provide  
16  
17 as many eligible residents as possible with access to this programme over the three-year life  
18  
19 of the project, with a minimum expectation of engagement from 1500 programme users.  
20  
21  
22  
23

#### 24 25 **Programme and Evaluation Materials and Procedure** 26

27  
28 The content of the Active Herts programme has been based on the review [11-12]  
29  
30 discussed to include BCTs found to be present in effective physical activity interventions,  
31  
32 with the exception of 'Biofeedback' as giving each participant heart rate monitors in a  
33  
34 programme of this size is unfeasible. Many of the BCTs are included in the booklet given to  
35  
36 programme users used by 'Get Active Specialists' during their consultations with  
37  
38 programme users, and target all six facets of the COM-B model of behaviour change ([17],  
39  
40 see Table 1). Programme users in both delivery groups will receive the same content in  
41  
42 terms of an initial 45 minute consultation with a Get Active Specialist (with additional  
43  
44 consultations at 3, 6, and 12 months), an Active Herts booklet, a two week booster call, and  
45  
46 access to activities in their local area. All programme contacts in person and by phone will  
47  
48 be on a one-to-one basis. Aside from access to a range of free group activity sessions over  
49  
50 the first 12 weeks, there are no additional incentives for programme users to attend  
51  
52 consultation  
53  
54  
55  
56  
57  
58  
59  
60

1  
2  
3  
4  
5  
6  
7  
8  
9  
10  
11  
12  
13  
14  
15  
16  
17  
18  
19  
20  
21  
22  
23  
24  
25  
26  
27  
28  
29  
30  
31  
32  
33  
34  
35  
36  
37  
38  
39  
40  
41  
42  
43  
44  
45  
46  
47  
48  
49  
50  
51  
52  
53  
54  
55  
56  
57  
58  
59  
60

*Insert Table 1 about here*

### **Get Active Specialists**

One Get Active Specialist has been employed in each of the four localities for the three-year duration of the programme. The specialists will work with local GPs and Mind centres to recruit eligible programme users. The specialists all have a minimum of level 3 Register of Exercise Professional and GP Exercise Referral qualifications. The Get Active Specialists will be further trained so that conversations with programme users can be user-led, involving open-ended questions, which allow programme users to take ownership of setting their own goals, plans, and rewards for progress. Consequently, the specialists will receive the following training specific to this programme:

- The two day 'British Heart Foundation: Promoting health behaviour change – A solution focused approach' course (<http://www.bhfactive.org.uk/training-and-events-item/506/index.html>)
- The three day 'The Wright Foundation: Obesity and Diabetes' course ([http://www.wrightfoundation.com/spec\\_ob\\_di.php](http://www.wrightfoundation.com/spec_ob_di.php))
- The one day 'The Wright Foundation: Level 4 mental health' course ([http://www.wrightfoundation.com/spec\\_men.php](http://www.wrightfoundation.com/spec_men.php))
- A two-day workshop, followed by quarterly one-day boosters, on motivational interviewing, health coaching, and behaviour change led by a Chartered Sport and Exercise and Health Psychologist and Research Fellow (AC, NH).

The two Specialists working in the localities with the potential to provide exercise buddies will also attend a one day Recruiting and Retaining Volunteer course organised by Volunteer

1  
2  
3 Centres, Hertfordshire (<http://www.volunteeringherts.org.uk/index.php/events/details/12->  
4  
5 recruiting-and-retaining-volunteers).  
6  
7

### 8 **Assessment of Fidelity**

9  
10  
11 To ensure fidelity of programme delivery, a number of measures will be put in place.  
12  
13 Get Active Specialists (GAS) will record a random sample of consultations and review the  
14  
15 audio amongst themselves, project lead and at quarterly booster sessions with the trainers.  
16  
17 The specialists will score each consultation with the Motivational Interviewing Treatment  
18  
19 Integrity coding scheme (MITI; [22]) and a checklist of BCTs. The MITI will score the  
20  
21 specialists on five domains core to motivational interviewing: Evocation – the GAS works  
22  
23 proactively to evoke participant’s own reasons for change; Collaboration – the GAS actively  
24  
25 fosters and encourages power sharing in the interaction; Autonomy/Support – The GAS  
26  
27 adds significantly to the feeling and meaning of participant’s expression of autonomy;  
28  
29 Direction – The GAS resists the righting reflex, yet generally does not miss opportunities to  
30  
31 direct participant toward the target behaviour; Empathy – The GAS shows evidence of deep  
32  
33 understanding of participant’s point of view. Every three months throughout the duration of  
34  
35 the evaluation, the GAS and project lead will meet for booster sessions with a Chartered  
36  
37 Sport and Exercise and Health Psychologist and Research Fellow (AC, NH) to review  
38  
39 recorded consultations, recap training, discuss any barriers to successful delivery, and  
40  
41 highlight what is working well.  
42  
43  
44  
45  
46  
47  
48  
49

### 50 **Outcome Measures**

#### 51 *Primary outcomes:*

52  
53 Physical activity will be measured with the International Physical Activity  
54  
55 Questionnaire (IPAQ; [23]). Six questions will assess the level of vigorous and moderate-  
56  
57  
58  
59  
60

1  
2  
3 intensity physical activity, and walking of each participant over the last week by asking the  
4  
5 amount of time spent being active and on how many days for each, with the minimum being  
6  
7 10 minutes at a time. The IPAQ allows a Metabolic Equivalent of Task (MET) score to be  
8  
9 calculated for each activity type by weighting its energy requirements, with 3.3 METs for  
10  
11 walking, 4 METs for moderate-intensity activity, and 8 METs for vigorous-intensity activity. A  
12  
13 total activity MET score can then be calculated accounting for intensity [24]. The IPAQ also  
14  
15 asks one question about how much time is spent sitting on a weekday over the last seven  
16  
17 days. An additional two questions will ask about sporting participation over the last week by  
18  
19 asking the amount of time spent doing sports and on how many days, with the minimum  
20  
21 being 10 minutes at a time.  
22  
23  
24  
25

#### 26 27 *Secondary outcomes:*

28  
29 Mental well-being will be measured using the Warwick Edinburgh Mental Well-being  
30  
31 Scale (WEMWBS; [25]), a 14-item scale exploring thoughts and feelings over the last two  
32  
33 weeks. Programme users are presented with items such as 'I've been feeling useful' or 'I've  
34  
35 been thinking clearly' and must rate themselves on a scale from 1 '*None of the time*' to 5 '*All*  
36  
37 *of the time*'.  
38  
39

40  
41 Perceptions of health will be measured using the Euroqual EQ-5D-5L [26], which has  
42  
43 five domains focusing on mobility, self-care, usual activities, pain/discomfort, and  
44  
45 anxiety/depression, with one question per domain. Each question has five options to choose  
46  
47 from ranging from no problems to inability to function. An additional question also asks how  
48  
49 good or bad programme users perceive their health to be on a scale ranging from 0 (*the*  
50  
51 *worst health you can imagine*) to 100 (*the best health you can imagine*).  
52  
53

#### 54 55 *COM-B measures*

1  
2  
3 All of the COM-B related scales were validated in a previous study [18] and produce  
4 a mean score apart for self-efficacy which produces a total score. Self-monitoring will be  
5 measured by two items, which ask programme users to rate how much they agree with  
6 statements such as 'I constantly monitored myself whether I exercise frequently enough' on  
7 a scale from 1 'Completely disagree' to 4 'Totally agree', retrospectively over the past week  
8 [24].  
9

10  
11  
12 Action Planning will be measured by four items about when, where, how, and how  
13 often programme users make detailed plans regarding physical activity on a scale from 1  
14 'Completely disagree' to 4 'Totally agree', retrospectively over the past week [28].  
15

16  
17  
18 Self-efficacy will be measured with the Physical Exercise Self-Efficacy Scale [29],  
19 which consists of five items exploring programme users' ability to carry out their  
20 behavioural intentions in the face of challenges, such as 'even when I feel tense'. The items  
21 will be measured on a scale from 1 (*Very uncertain*) to 4 (*Very certain*).  
22

23  
24  
25 Intentions will be measured using three items [30], each referring to the amount of  
26 physical activity the individual intends to do over the next week with statements such as 'I  
27 expect to take part in regular physical activity over the next week'. Each item is rated on a 7-  
28 point scale from 1 (*Strongly disagree*) to 7 (*Strongly agree*).  
29

30  
31  
32 Attitudes will be measured using four items [30], each referring to the participant's  
33 attitudes towards physical activity in terms of how harmful, healthy, enjoyable, and boring  
34 they view it on a set of 7-point scales anchored by positive and negative views (e.g. 1 = *Very*  
35 *unhealthy* to 7 = *Very healthy*).  
36

## 37 38 39 40 41 42 43 44 45 46 47 48 49 50 51 52 53 **Analytical Methods**

### 54 55 56 57 58 59 60 *Outcomes evaluation*



1  
2  
3 The outcomes evaluation will be based on a comparison between recorded values at  
4  
5 baseline for the primary and secondary outcomes and those captured at the various follow-  
6  
7 up points. The association between exposure to the programme and changes in the primary  
8  
9 and secondary outcomes between baseline and post-participation will be examined using  
10  
11 repeated measures multiple regression models, with covariates including follow-up time  
12  
13 point, and whether each participant is in a 'standard delivery' or 'enhanced delivery' area.  
14  
15 An interaction term will be fitted to identify if trends in outcomes by follow-up point differ  
16  
17 between the two area types. Differences in baseline characteristics of programme users  
18  
19 between the 'standard' and 'enhanced' delivery areas will be tested using either an  
20  
21 Independent Samples T-test or a Mann-Whitney U test depending on whether the variable  
22  
23 being tested follows a normal distribution. Any potential confounding factors associated  
24  
25 with variant characteristics of the two sets of programme users will be adjusted for by  
26  
27 inclusion as covariates in the models. If changes in the primary outcome are found,  
28  
29 additional regression models will explore whether these changes are driven by changes in  
30  
31 COM-B-related measures.  
32  
33  
34  
35  
36  
37  
38

39 Loss to follow-up is a common problem in this form of evaluation and the sample of  
40  
41 programme users providing data at all follow-up points is likely to differ from those with  
42  
43 lower engagement in the evaluation. Depending on the degree of loss to follow-up, a  
44  
45 complete case analysis will be undertaken and the results compared with an analysis of all  
46  
47 data available, whereby simple mean imputation will be used in the case of missing values.  
48  
49 Should the results from the two models show substantial variation, then multiple  
50  
51 imputation techniques will be employed.  
52  
53  
54

55  
56  
57 *Process evaluation*  
58  
59  
60

1  
2  
3 A process evaluation is a systematic method of collecting, analysing, and using  
4  
5 information to understand the functioning of a programme or intervention by examining  
6  
7 implementation, mechanisms of impact, and contextual factors [31]. A process evaluation of  
8  
9 Active Herts will take place in three phases with each phase exploring a different theme.  
10  
11 Data will be collected in the form of one-to-one interviews with stakeholders, group  
12  
13 interviews with the Get Active Specialists, and focus groups with programme users.  
14  
15 Stakeholders interviewed will include commissioners, higher programme management,  
16  
17 project delivery partners, and health service practitioners.  
18  
19  
20  
21

22  
23 The initial phase will focus on areas related to the set-up of Active Herts, including  
24  
25 developments in the method of recruitment or delivery of the programme, barriers and  
26  
27 facilitators to reaching the target audience, partnership working, and engagement with  
28  
29 primary and secondary care. The second phase will explore deviations in the programme  
30  
31 delivery from those planned, potential mechanisms by which the programme works, and  
32  
33 external factors which may influence the programme. A final phase will take on a reflective  
34  
35 focus looking back over the programme and considering what worked well and what did  
36  
37 not, identifying examples of best practice. It will also consider the future sustainability of  
38  
39 Active Herts including exit routes for programme users and continuation of the programme  
40  
41 where appropriate. In all phases, other emerging themes will be explored as identified  
42  
43 during the process.  
44  
45  
46  
47

#### 48 49 *Economic evaluation*

50  
51 The economic evaluation will examine the costs of delivery of the Active Herts  
52  
53 programme against the benefits gained in terms of reduced risk of morbidity from a range  
54  
55 of chronic conditions, the risk of which is associated with physical inactivity. The ratio of  
56  
57  
58  
59  
60

1  
2  
3 costs to effects – i.e. “the incremental cost-effectiveness ratio” (ICER) will be assessed  
4  
5 against a “cost-effectiveness threshold”, representing the opportunity cost of spending the  
6  
7 money. In the UK, the National Institute for Health and Care Excellence (NICE) uses a  
8  
9 threshold range of £20,000–30,000; if interventions are within this area of cost-  
10  
11 effectiveness or below, then they are considered “cost-effective” or good “value for  
12  
13 money”.  
14  
15

16  
17  
18 This evaluation will use Version 2 (November 2016) of the Sport England MOVES  
19  
20 model, a tool for conducting economic analysis of physical activity programmes and  
21  
22 interventions developed by the Health Economics Group at the University of East Anglia.  
23  
24 The MOVES tool will be used to monetarise the reduced disease burden associated with  
25  
26 participation in Active Herts by comparing their predicted disease risk against that of a  
27  
28 similar cohort of the population not participating in any programme. The MOVES model will  
29  
30 link changes in physical activity (using increases in physical activity energy expenditure due  
31  
32 to the programme) with changes in disease prevalence over time for depression, diabetes,  
33  
34 stroke, coronary heart disease, dementia, colorectal cancer, breast cancer, and hip fracture.  
35  
36 The model then assesses the financial return to the NHS (treatment costs saved) and the  
37  
38 health impacts (Quality Adjusted Life Years (QALYs) gained) in the ‘enhanced delivery’  
39  
40 compared with the ‘standard delivery’ area, which are used to calculate indicators of cost  
41  
42 effectiveness; the Incremental Cost Effectiveness Ratio, NHS return on Investment, and  
43  
44 QALYs return on investment.  
45  
46  
47  
48  
49  
50

### 51 52 **Ethics and Dissemination**

53  
54  
55 This study has been approved by both the Faculty of Medicine and Health Sciences  
56  
57 Research Ethics Committee at University of East Anglia (Ref: 20152016 – 28) and by the  
58  
59  
60

1  
2  
3 University of Hertfordshire Health and Human Science Ethics Committee with Delegated  
4 Authority (protocol number: LMS/PGR/UH/02427). All programme users will be provided  
5  
6  
7 with a Participant Information and Consent Form. Informed written consent will be obtained  
8  
9  
10 from all programme users in the evaluation. The results of this study will be published in  
11  
12 peer-reviewed journals, presented at national and international conferences, and shared  
13  
14 through the study website, and local public health and community sport partnership forums  
15  
16 and newsletters.  
17  
18  
19

## 20 Discussion

21  
22  
23 Inactivity is a major issue in England with large health and economic burdens  
24 associated with not participating in the recommended amount of activity. This programme  
25  
26 targets inactive adults with additional health problems in areas that would benefit the most  
27  
28 from a community physical activity programme. Pragmatic considerations mean that the  
29  
30 form of programme delivery differs across programme areas, providing a comparison in the  
31  
32 form of a natural experiment. Active Herts incorporates the latest evidence of the BCTs that  
33  
34 work both during the participation in the programme and over the longer term to aid  
35  
36 sustainable behaviour change. These evidence-based techniques will be combined with an  
37  
38 effective delivery approach in motivational interviewing and health coaching that allow  
39  
40 discussions to be participant-led so that the programme users take ownership over their  
41  
42 goals, progress, and rewards. Additionally, this evaluation will measure key drivers of  
43  
44 physical activity from the most up to date behaviour change theory (COM-B), allowing  
45  
46 evaluation of not only whether physical activity has increased but why. This will provide the  
47  
48 basis with which to refine a scalable intervention that could be more robustly tested in a  
49  
50 randomised controlled trial.  
51  
52  
53  
54  
55  
56  
57  
58  
59  
60

## Declarations

### *Acknowledgements*

The authors would like to thank Adan Freeman and Joe Capon the project officers, and Fiona Deans, the project manager from Herts Sports Partnership, and the public health lead, Piers Simey, from Hertfordshire County Council. We would also like to thank the Get Active Specialists (Lee Bruce, Alison Goodchild, Hannah Marsh, and Andrew Rix)

### *Authors' contributions*

NH prepared the draft versions and final manuscript. AC read and provided feedback on the drafts, and approved the final manuscript. AJ prepared the analysis and evaluation sections, read and provided feedback on the drafts, and approved the final manuscript. LB read and provided feedback on the drafts, and approved the final manuscript.

### *Funding*

This work was supported by Sport England (Ref: 2015000295), Broxbourne Borough Council, East and North Herts CCG, Herts Valley CCG, Hertfordshire Public Health, Herts Mind Network, Mind in Mid Herts, and Herts Sports Partnership.

### *Competing interests*

Nothing to declare

## References

- 1  
2  
3 1. Global Recommendations on Physical Activity for Health. World Health Organization.  
4  
5 2010 [http://www.who.int/dietphysicalactivity/factsheet\\_recommendations/en/](http://www.who.int/dietphysicalactivity/factsheet_recommendations/en/).  
6  
7 Accessed March 9 2017.  
8  
9
- 10 2. Barengo NC, Antikainen R, Borodulin K, Harald K, Jousilahti P. Leisure-time physical  
11  
12 activity reduces total and cardiovascular mortality and cardiovascular disease  
13  
14 incidence in older adults. *Am Geriatr Soc* 2016; DOI: 10.1111/jgs.14694  
15  
16
- 17 3. Bauman AE. Updating the evidence that physical activity is good for health: an  
18  
19 epidemiological review 2000–2003. *J Sci Med Sport* 2004;7(1):6-19.  
20  
21
- 22 4. Schuch FB, Vancampfort D, Richards J, Rosenbaum S, Ward PB, Stubbs B. Exercise as  
23  
24 a treatment for depression: A meta-analysis adjusting for publication bias. *J Psychiatr*  
25  
26 *Res* 2016;77:42-51.  
27  
28
- 29 5. Sporting future – First annual report. 2017  
30  
31 <https://www.gov.uk/government/publications/sporting-future-first-annual-report>  
32  
33 Accessed March 9 2017.  
34  
35
- 36 6. Statistics on Obesity, Physical Activity and Diet. Health and Social Care Information  
37  
38 Centre. 2014 [http://content.digital.nhs.uk/catalogue/PUB13648/Obes-phys-acti-](http://content.digital.nhs.uk/catalogue/PUB13648/Obes-phys-acti-diet-eng-2014-rep.pdf)  
39  
40 [diet-eng-2014-rep.pdf](http://content.digital.nhs.uk/catalogue/PUB13648/Obes-phys-acti-diet-eng-2014-rep.pdf). Accessed March 9 2017.  
41  
42
- 43 7. The Health Survey for England – 2012. Health and Social Care Information Centre  
44  
45 England. 2013 <http://content.digital.nhs.uk/catalogue/PUB13218>. Accessed March 9  
46  
47 2017.  
48  
49
- 50 8. Giles-Corti B, Donovan RJ. Socioeconomic status differences in recreational physical  
51  
52 activity levels and real and perceived access to a supportive physical environment.  
53  
54 *Prev Med* 2002;35(6):601-611.  
55  
56  
57  
58  
59  
60

- 1  
2  
3 9. Wardle J, Griffith J. Socioeconomic status and weight control practices in British  
4  
5 adults. *J Epidemiol Community Health* 2001;55(3):185-190.  
6
- 7  
8 10. Cassidy S, Chau JY, Catt M, Bauman A, Trenell MI. Cross-sectional study of diet,  
9  
10 physical activity, television viewing and sleep duration in 233 110 adults from the UK  
11  
12 Biobank; the behavioural phenotype of cardiovascular disease and type 2 diabetes.  
13  
14 *BMJ open* 2016;6(3):e010038.  
15
- 16  
17 11. Howlett N, Trivedi D, Troop N, Chater AM. *What are the most effective behaviour*  
18  
19 *change techniques to promote physical activity and/or reduce sedentary behaviour in*  
20  
21 *inactive adults? A systematic review and meta-analysis.* Manuscript submitted.  
22  
23
- 24 12. Howlett N, Trivedi D, Troop N, Chater AM. What are the most effective behaviour  
25  
26 change techniques to promote physical activity and/or reduce sedentary behaviour  
27  
28 in inactive adults? A systematic review protocol. *BMJ open* 2015;5:e008573  
29
- 30 13. Michie S, Richardson M, Johnston M, Abraham C, Francis J, Hardeman W, et al. The  
31  
32 behavior change technique taxonomy (v1) of 93 hierarchically clustered techniques:  
33  
34 building an international consensus for the reporting of behavior change  
35  
36 interventions. *Ann Behav Med* 2013;46(1):81-95.  
37  
38
- 39 14. Chater AC. The power of language and emotion in specialist obesity services. *Eur*  
40  
41 *Health Psychol* 2016;18(5):184-188.  
42  
43
- 44 15. Rubak S, Sandbæk A, Lauritzen T, Christensen B. Motivational interviewing: a  
45  
46 systematic review and meta-analysis. *Br J Gen Pract* 2005;55(513):305-312.  
47  
48
- 49 16. Michie S, van Stralen MM, West R. The behaviour change wheel: a new method for  
50  
51 characterising and designing behaviour change interventions. *Implement Sci*  
52  
53 2011;6(1):42.  
54  
55  
56  
57  
58  
59  
60

- 1  
2  
3 17. Cane J, Richardson M, Johnston M, Ladha R, Michie S. From lists of behaviour change  
4 techniques (BCTs) to structured hierarchies: Comparison of two methods of  
5 developing a hierarchy of BCTs. *Br J Health Psychol* 2015;20:130-150.  
6  
7  
8  
9  
10 18. Howlett N, Schulz J, Trivedi D, Troop N, Chater AM. *Exploring the construct and*  
11 *predictive validity of the COM-B model for physical activity*. Manuscript submitted.  
12  
13  
14 19. Des Jarlais DC, Lyles C, Crepaz N. Improving the reporting quality of nonrandomized  
15 evaluations of behavioral and public health interventions: the TREND statement. *Am*  
16 *J Public Health* 2004;94(3):361-366.  
17  
18  
19  
20  
21 20. Hoffmann TC, Glasziou PP, Boutron I, Milne R, Perera R, Moher D, et al. Better  
22 reporting of interventions: template for intervention description and replication  
23 (TIDieR) checklist and guide *BMJ*. 2014;348:g1687.  
24  
25  
26  
27  
28  
29 21. Public health profiles. Health profile 2014. 2014  
30 <http://fingertipsreports.phe.org.uk/health-profiles/2014/e10000015.pdf>. Accessed  
31 March 9 2017.  
32  
33  
34  
35  
36 22. Moyers T, Martin T, Manuel J, Miller W, Ernst D. Revised global scales: Motivational  
37 interviewing treatment integrity 3.1.1 (MITI 3.1.1). Unpublished manuscript,  
38 University of New Mexico, Albuquerque, NM 2010.  
39  
40  
41  
42  
43 23. Booth ML, Ainsworth BE, Pratt M, Ekelund U, Yngve A, Sallis JF, Oja P. International  
44 physical activity questionnaire: 12-country reliability and validity. *Med Sci Sports*  
45 *Exerc* 2003;195(9131/03):3508-1381.  
46  
47  
48  
49  
50 24. Guidelines for data processing and analysis of the international physical activity  
51 questionnaire (IPAQ). International Physical Activity Questionnaire website. 2005  
52 <https://sites.google.com/site/theipaq/scoring-protocol>. Accessed March 9 2017.  
53  
54  
55  
56  
57  
58  
59  
60



- 1  
2  
3 25. Tennant R, Hiller L, Fishwick R, Platt S, Joseph S, Weich S, et al. The Warwick-  
4  
5 Edinburgh mental well-being scale (WEMWBS): development and UK validation.  
6  
7 Health Qual Life Outcomes 2007;5(1):63.  
8  
9  
10 26. Rabin R, Charro Fd. EQ-SD: a measure of health status from the EuroQol Group. Ann  
11  
12 Med 2001;33(5):337-343.  
13  
14 27. Sniehotta FF, Scholz U, Schwarzer R, Fuhrmann B, Kiwus U, Völler H. Long-term  
15  
16 effects of two psychological interventions on physical exercise and self-regulation  
17  
18 following coronary rehabilitation. Int J Behav Med 2005;12(4):244-255.  
19  
20  
21 28. Sniehotta FF, Schwarzer R, Scholz U, Schüz B: Action planning and coping planning  
22  
23 for long-term lifestyle change: theory and assessment. Eur J Soc Psychol  
24  
25  
26 2005;35(4):565-576.  
27  
28  
29 29. Schwarzer R, Renner B. Health-specific self-efficacy scales. Freie Universität Berlin.  
30  
31 2009  
32  
33 <http://citeseerx.ist.psu.edu/viewdoc/download?doi=10.1.1.386.5658&rep=rep1&typ>  
34  
35 [e=pdf](http://citeseerx.ist.psu.edu/viewdoc/download?doi=10.1.1.386.5658&rep=rep1&type=pdf). Accessed March 9 2017.  
36  
37  
38 30. Francis JJ, Eccles MP, Johnston M, Walker A, Grimshaw J, Foy R, et al. Constructing  
39  
40 questionnaires based on the theory of planned behaviour. A manual for health  
41  
42 services researchers. 2004  
43  
44 <http://openaccess.city.ac.uk/1735/1/TPB%20Manual%20FINAL%20May2004.pdf>.  
45  
46  
47 Accessed March 9 2017.  
48  
49  
50 31. Bauman A, Nutbeam D. Evaluation in a nutshell: a practical guide to the evaluation of  
51  
52 health promotion programs. McGraw Hill; 2013.  
53  
54  
55  
56  
57  
58  
59  
60

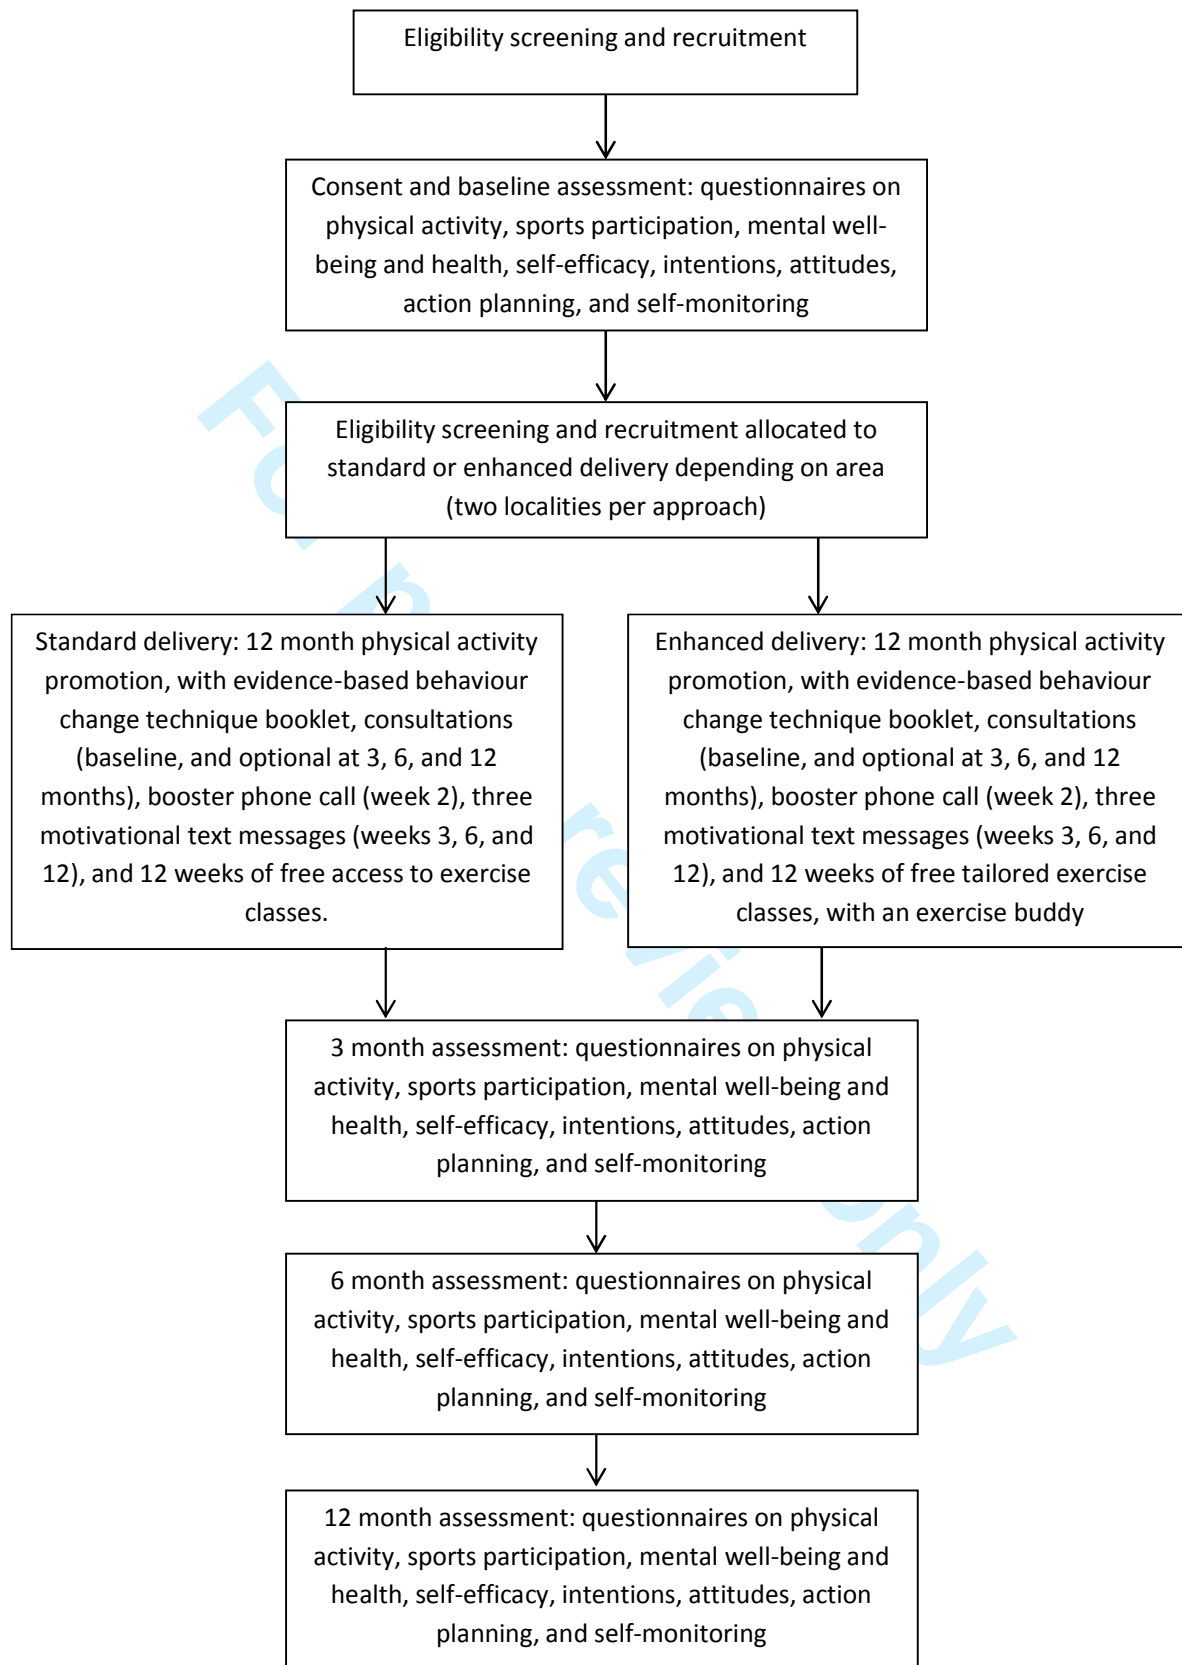

Figure 1: Active Herts programme design

Table 1: Programme content specified by behaviour change techniques and linked to constructs of the COM-B model.

| Programme component   | Behaviour change technique | COM-B construct targeted                              | Content                                                                                                                                                                                                                                                                                                                                                                           |
|-----------------------|----------------------------|-------------------------------------------------------|-----------------------------------------------------------------------------------------------------------------------------------------------------------------------------------------------------------------------------------------------------------------------------------------------------------------------------------------------------------------------------------|
| Booklet (both groups) | Pros and Cons              | Reflective motivation                                 | A page asking whether exercise is good for you and programme users are given two blank columns to fill out with possible advantages and disadvantages of becoming more active. They are then asked how confident they feel about becoming active on a scale of 1-10.                                                                                                              |
|                       | Problem Solving            | *Psychological capability;<br>Reflective motivation   | Programme users are asked to think about their current situation and to list the things that might be currently stopping them from being active and how they might overcome them.                                                                                                                                                                                                 |
|                       | Goal setting               | Reflective motivation                                 | Programme users are given the opportunity to set short (two weeks), medium (3 months), or long-term (12 months) goals, and then rate how confident they are of achieving each one from 1-10.                                                                                                                                                                                      |
|                       | Action planning            | Psychological capability<br>and Reflective motivation | A page allowing programme users to complete sections referring to their plans to becoming more active in terms of what they are going to do, where they are going to do it, when they are going to do it, and who they are going to do it with. A second page allows them to explore their time management by mapping out the week in terms of morning, afternoons, and evenings. |
|                       | Relapse prevention         | *Psychological capability;<br>Reflective motivation   | In contrast to the problem solving page which focuses on current problems, this page explains how even the most habitual exercisers can struggle at times. Programme users are asked to think about situations                                                                                                                                                                    |

---

|                                                                                                 |                                                                              |                                                 |                                                                                                                                                                                                                                                                                                                                                                         |
|-------------------------------------------------------------------------------------------------|------------------------------------------------------------------------------|-------------------------------------------------|-------------------------------------------------------------------------------------------------------------------------------------------------------------------------------------------------------------------------------------------------------------------------------------------------------------------------------------------------------------------------|
|                                                                                                 |                                                                              |                                                 | in the future that may affect their progress and then about options to avoid or cope with these situations.                                                                                                                                                                                                                                                             |
| 1<br>2<br>3<br>4<br>5<br>6<br>7<br>8<br>9<br>10<br>11<br>12<br>13<br>14<br>15<br>16<br>17<br>18 | Self-monitoring of behaviour                                                 | Psychological capability                        | Programme users are given an exercise and activity diary to track their progress and highlight their engagement. A table contains columns for the date, activities completed, time in minutes, enjoyment level (from 1, low to 10, high), and how they felt after completing the activity. The table contains several rows so programme users can track this over time. |
| 19<br>20<br>21<br>22<br>23<br>24<br>25<br>26                                                    | Information about health consequences: Information on emotional consequences | Psychological capability; Reflective motivation | A page summarises the health and emotional benefits of being active in a positively framed manner. For example, did you know that being active can 'help you manage high blood pressure' and 'make you feel good and improve your mental health'.                                                                                                                       |
| 27<br>28<br>29<br>30<br>31<br>32<br>33<br>34                                                    | Instruction on how to perform the behaviour                                  | *Psychological capability                       | Programme users are given the national exercise guidelines for moderate and vigorous activity. Additionally information is given for examples of moderate and vigorous activity, how to break up long periods of sitting, how to improve balance to reduce the chance of falls, and an example of how these activities can fit into everyday life.                      |
| 35<br>36<br>37<br>38<br>39<br>40                                                                | Self-reward                                                                  | Automatic motivation                            | Programme users are told the importance of rewarding themselves for the effort they make towards their activity goals. Examples are then given of how to reward themselves in ways that are healthy and free. For example, 'listen to music' or 'have a nice relaxing bath'. Self-reward                                                                                |

---

1  
2  
3  
4  
5  
6  
7  
8  
9  
10  
11  
12  
13  
14  
15  
16  
17  
18  
19  
20  
21  
22  
23  
24  
25  
26  
27  
28  
29  
30  
31  
32  
33  
34  
35  
36  
37  
38  
39  
40  
41  
42  
43  
44  
45  
46  
47  
48  
49

---

is also discussed briefly during the goal setting page when thinking about what success looks like.

---

|                            |                                                      |                                              |                                                                                                                                                                                                                                                                                                                                                                                                                                                                                                                                |
|----------------------------|------------------------------------------------------|----------------------------------------------|--------------------------------------------------------------------------------------------------------------------------------------------------------------------------------------------------------------------------------------------------------------------------------------------------------------------------------------------------------------------------------------------------------------------------------------------------------------------------------------------------------------------------------|
| Consultation (both groups) | Social support unspecified; Social support emotional | Social opportunity; Automatic motivation     | Programme users are given an initial 45 minute consultation in person one-to-one where motivational interviewing and health coaching are used to structure the session to fit participant needs, move them towards becoming more active, signposting activities and discussing goals and plans, while providing emotional support. This is then repeated in subsequent consultation meetings at 3, 6, and 12 months. The additional consultations will vary between 15-30 minutes and are optional based on participant needs. |
|                            | Credible source                                      | *Social opportunity; Automatic motivation    | Expert Get Active Specialists who are trained in motivational interviewing and behaviour change, with specialist knowledge of obesity, diabetes, exercise referral, and mental health will discuss becoming more active in a favourable light with programme users.                                                                                                                                                                                                                                                            |
|                            | Verbal persuasion about capability                   | Reflective motivation                        | Programme users will set goals and the Get Active Specialists will encourage the participant's belief in their ability to fulfil those goals and make long-term change.                                                                                                                                                                                                                                                                                                                                                        |
|                            | Focus of past success                                | Reflective motivation                        | During the consultation programme users will set physical activity goals and the Get Active Specialists will discuss previous success or progress                                                                                                                                                                                                                                                                                                                                                                              |
| Exercise sessions (both)   | Instruction on how to perform the                    | Social opportunity; Psychological capability | Programme users can choose to attend 12 weeks of exercise classes either referred to them (standard delivery) or organised as bespoke                                                                                                                                                                                                                                                                                                                                                                                          |

|                                     |                                                                                              |                                                                       |                                                                                                                                                                                                                                                                                                                                                                                                                                |
|-------------------------------------|----------------------------------------------------------------------------------------------|-----------------------------------------------------------------------|--------------------------------------------------------------------------------------------------------------------------------------------------------------------------------------------------------------------------------------------------------------------------------------------------------------------------------------------------------------------------------------------------------------------------------|
| groups)                             | behaviour;<br>Demonstration of the<br>behaviour;<br>Behavioural<br>practice/rehearsal        |                                                                       | sessions (enhanced delivery) by the Get Active Specialists. These will involve detailed instruction on how to perform a range of exercises (e.g. yoga, pilates, light to moderate-intensity circuit training). During these classes programme users will be given demonstrations of the correct way to perform the activities and provided with ample opportunity to practice and gain confidence in performing the exercises. |
|                                     | Graded tasks                                                                                 | Physical capability                                                   | During the exercise classes, exercise specialists will encourage programme users to start slowly and build up intensity throughout the 12 weeks.                                                                                                                                                                                                                                                                               |
| Booster call<br>(both groups)       | Social support<br>unspecified; Verbal<br>persuasion about<br>capability; Prompts<br>and cues | Social opportunity;<br>Reflective motivation;<br>Physical opportunity | Programme users receive a phone call at 2 weeks, which is approximately 5 minutes in duration prompting them to keep working towards their physical activity goals and stating that they are capable of achieving them.                                                                                                                                                                                                        |
| Test messages<br>(both groups)      | Social support<br>unspecified; Verbal<br>persuasion about<br>capability; Prompts<br>and cues | Social opportunity;<br>Reflective motivation;<br>Physical opportunity | A text message is sent to programme users at 2, 6, and 12 weeks prompting them to keep working towards their physical activity goals and stating that they are capable of achieving them.                                                                                                                                                                                                                                      |
| Exercise<br>buddies and<br>tailored | Social support<br>practical and<br>emotional                                                 | Social opportunity;<br>Automatic motivation                           | For programme users in the enhanced delivery areas, Get Active Specialists will also run and/or organise a range of exercise classes based on the preferences of programme users, where they may also be                                                                                                                                                                                                                       |

1  
2  
3  
4  
5  
6  
7  
8  
9  
10  
11  
12  
13  
14  
15  
16  
17  
18  
19  
20  
21  
22  
23  
24  
25  
26  
27  
28  
29  
30  
31  
32  
33  
34  
35  
36  
37  
38  
39  
40  
41  
42  
43  
44  
45  
46  
47  
48  
49

---

|                                                 |                                                                                                                    |
|-------------------------------------------------|--------------------------------------------------------------------------------------------------------------------|
| exercise classes<br>(enhanced<br>delivery only) | paired with an exercise buddy to help them attend the exercise classes<br>and provide emotional support if needed. |
|-------------------------------------------------|--------------------------------------------------------------------------------------------------------------------|

---

Note: \*denotes that a BCT was not explicitly linked to a COM-B construct in the consensus study from Cane et al. (2015), but the authors believe this BCT will impact this area.

For peer review only

# BMJ Open

**How effective is community physical activity promotion in areas of deprivation for inactive adults with Cardiovascular Disease risk and/or mental health concerns? Study protocol for a pragmatic observational evaluation of the 'Active Herts' physical activity programme**

|                                 |                                                                                                                                                                                                                                                                                                                                                                                                                         |
|---------------------------------|-------------------------------------------------------------------------------------------------------------------------------------------------------------------------------------------------------------------------------------------------------------------------------------------------------------------------------------------------------------------------------------------------------------------------|
| Journal:                        | <i>BMJ Open</i>                                                                                                                                                                                                                                                                                                                                                                                                         |
| Manuscript ID                   | bmjopen-2017-017783.R1                                                                                                                                                                                                                                                                                                                                                                                                  |
| Article Type:                   | Protocol                                                                                                                                                                                                                                                                                                                                                                                                                |
| Date Submitted by the Author:   | 14-Sep-2017                                                                                                                                                                                                                                                                                                                                                                                                             |
| Complete List of Authors:       | Howlett, Neil; University of Hertfordshire, Department of Psychology and Sport Sciences<br>Jones, Andrew; University of East Anglia, Norwich Medical School<br>Bain, Lucy; University of East Anglia Faculty of Medicine and Health Sciences, Norwich Medical School<br>Chater, Angel; University of Bedfordshire, Department of Sport Science and Physical; University of Hertfordshire, Psychology and Sport Sciences |
| <b>Primary Subject Heading</b>: | Public health                                                                                                                                                                                                                                                                                                                                                                                                           |
| Secondary Subject Heading:      | Sports and exercise medicine                                                                                                                                                                                                                                                                                                                                                                                            |
| Keywords:                       | physical activity programme, behaviour change, inactive adults, behaviour change techniques, COM-B                                                                                                                                                                                                                                                                                                                      |
|                                 |                                                                                                                                                                                                                                                                                                                                                                                                                         |

SCHOLARONE™  
Manuscripts



1  
2  
3  
4  
5  
6  
7  
8  
9  
10  
11  
12  
13  
14  
15  
16  
17  
18  
19  
20  
21  
22  
23  
24  
25  
26  
27  
28  
29  
30  
31  
32  
33  
34  
35  
36  
37  
38  
39  
40  
41  
42  
43  
44  
45  
46  
47  
48  
49  
50  
51  
52  
53  
54  
55  
56  
57  
58  
59  
60

**How effective is community physical activity promotion in areas of deprivation for  
inactive adults with Cardiovascular Disease risk and/or mental health concerns? Study  
protocol for a pragmatic observational evaluation of the 'Active Herts' physical activity  
programme**

Neil Howlett<sup>1\*</sup>, Andy Jones<sup>2</sup>, Lucy Bain<sup>2</sup>, Angel Chater<sup>1,3,4</sup>

<sup>1</sup>Department of Psychology and Sport Sciences, University of Hertfordshire, College Lane,  
Hatfield, Herts, AL10 9AB, UK

<sup>2</sup>Norwich Medical School, University of East Anglia, Norwich, NR4 7TJ, UK

<sup>3</sup>Institute for Sport and Physical Activity Research (ISPAR), University of Bedfordshire,  
Polhill Avenue, Bedford, MK41 9EA, UK

<sup>4</sup>UCL School of Pharmacy, Centre for Behavioural Medicine, Research Department of  
Practice and Policy, University College London, Tavistock Square, London, UK, WC1H 9JP

\*Corresponding author

Email: [n.howlett@herts.ac.uk](mailto:n.howlett@herts.ac.uk); Tel: 01707 285971

## **Abstract**

### **Introduction**

There is a high prevalence of inactive adults in the UK, and many suffer from conditions such as cardiovascular disease or poor mental health. These co-exist more frequently in areas of higher socio-economic deprivation. There is a need to test the effectiveness, acceptability, and sustainability of physical activity programmes. Active Herts uses novel evidence-based behaviour change techniques to target physical inactivity.

### **Methods and analysis**

Active Herts is a community physical activity programme for inactive adults aged 16+ with one or more risk factors for CVD and/or a mild to moderate mental health condition. This evaluation will follow a mixed-methods longitudinal (baseline, and 3, 6 and 12 month follow-ups) design. Pragmatic considerations mean delivery of the programme differs by locality. In two areas programme users will receive a behaviour change technique booklet, regular consultations, a booster phone call, motivational text messages, and signposting to 12 weeks of exercise classes. In another two areas programme users will also receive 12 weeks of free tailored exercise classes, with optional exercise 'buddies' available. An outcome evaluation will assess changes in physical activity as the primary outcome, and sporting participation, sitting, wellbeing, psychological capability, and reflective motivation as secondary outcomes. A process evaluation will explore the views of stakeholders, delivery staff, and programme leads. Economic evaluation will examine the programme costs against the benefits gained in terms of reduced risk of morbidity.

### **Ethics and dissemination**

1  
2  
3 This study was been approved by the Faculty of Medicine and Health Sciences  
4  
5 Research Ethics Committee at University of East Anglia. Informed written consent will be  
6  
7 obtained from programme users in the evaluation. Results will be published in peer-  
8  
9 reviewed journals, presented at conferences, and shared through the study website and  
10  
11 local community outlets.  
12  
13

#### 14 15 **Registration**

16  
17  
18 Clinicaltrials.gov ID number: NCT03153098  
19  
20  
21  
22  
23  
24

25 **Keywords:** Physical activity programme; behaviour change; inactive adults; behaviour  
26  
27 change techniques; COM-B  
28  
29  
30  
31  
32  
33  
34  
35  
36  
37  
38  
39  
40  
41  
42  
43  
44  
45  
46  
47  
48  
49  
50  
51  
52  
53  
54  
55  
56  
57  
58  
59  
60

### Strengths and Limitations

- The Active Herts programme is designed with the latest behaviour change theory and techniques in both the materials for programme users and the training for delivery staff.
- The Active Herts programme targets individuals in areas of deprivation with existing health issues that would benefit most from lifestyle changes.
- The main limitation is that due to pragmatic considerations participants will receive the two different delivery approaches based on their place of residence and not through randomisation.
- A secondary limitation is that due to financial constraints and the scale of recruitment (aiming for maximum reach) it is not possible to include an objective measure of physical activity.

1  
2  
3 **How effective is community physical activity promotion in areas of deprivation for**  
4  
5 **inactive adults with Cardiovascular Disease risk? Study protocol for a pragmatic**  
6  
7 **observational evaluation of the 'Active Herts' physical activity programme**  
8  
9

10  
11 **Introduction**  
12

13  
14 Physical inactivity is responsible for 6% of deaths globally, making it the fourth  
15 leading risk factor for mortality world-wide [1]. Being active is protective against  
16 cardiovascular disease (CVD), type 2 diabetes, and cancer [2-3], with strong evidence that  
17 exercise is an effective treatment for depression [4]. In England, 63% of men and 59% of  
18 women report participating in the recommended weekly levels of 150 minutes of moderate  
19 to vigorous physical activity [5], yet objectively-measured data suggest just 6% of men and  
20 4% of women meet this level [6]. Further, only 34% of men and 24% of women meet the  
21 guidelines for muscle-strengthening exercises on two or more days per week [7]. The Active  
22 People Survey from Sport England in 2015-16 found that only 36% of adults (41% of men  
23 and 32% of women) report taking part in sport once a week, with the figure decreasing to  
24 18% for sporting participation on three or more occasions weekly.  
25  
26  
27  
28  
29  
30  
31  
32  
33  
34  
35  
36  
37  
38  
39

40 Overall physical activity and sporting participation needs to be improved in the UK,  
41 but inactivity is even more prevalent in low-socioeconomic status (SES) adults and those  
42 suffering from major disease. Lower SES adults are less likely to participate in vigorous and  
43 moderate-intensity physical activity, and walking [8]. They are also more likely to perceive  
44 the opportunities to be active in their local environment more negatively shown through  
45 physical activity related factors such as attractiveness, safety, and how congested roads are  
46 [8]. Furthermore, lower SES adults are also less likely to perceive themselves as overweight  
47 or try to lose weight, which in turn lessens the chances of them participating in physical  
48  
49  
50  
51  
52  
53  
54  
55  
56  
57  
58  
59  
60

1  
2  
3 activity as a weight control strategy [9]. Additionally, those suffering from CVD and a  
4  
5 combination of CVD and type 2 diabetes report lower levels of physical activity and greater  
6  
7 sedentary behaviour in terms of television watching [10]. Overall, those living in low SES  
8  
9 areas and/or with ongoing diseases are an important target to increase physical activity  
10  
11 through intervention.  
12  
13

14  
15 The Active Herts programme will attempt to address adult inactivity by drawing on  
16  
17 the latest evidence analysing how to support inactive adults to be more physically active. A  
18  
19 recent systematic review has shown that interventions in inactive adults show statistically  
20  
21 significant small to moderate effect sizes post-intervention and small but still statistically  
22  
23 significant effect sizes for at least six months after intervention contact has finished (follow-  
24  
25 up) [11-12]. This review also analysed the behaviour change techniques [BCT; 13] that were  
26  
27 associated with effective interventions and highlighted several approaches that can be used  
28  
29 to heighten the likelihood of programmes and interventions producing meaningful changes  
30  
31 in physical activity. It was found practising the performance of physical activity and gradually  
32  
33 increasing its intensity were effective for physical activity change at both post-participation  
34  
35 and follow-up. Additionally, post-participation effectiveness was associated with being  
36  
37 shown how to be more active and 'Biofeedback' (using heart rate monitors to judge exercise  
38  
39 intensity), and effectiveness at follow-up was associated with creating detailed plans to be  
40  
41 active, receiving instructions on particular exercises (this may include during exercise  
42  
43 classes), rewarding oneself for progress, and utilising prompts or cues to exercise [11].  
44  
45  
46  
47  
48  
49

50  
51 Whilst understanding which techniques are effective when attempting to intervene  
52  
53 with an inactive population to increase physical activity is important, so too is the  
54  
55 communication style in which the techniques are delivered [14]. Motivational interviewing  
56  
57 has been shown to be an effective communication method with which to change several  
58  
59  
60

1  
2  
3 health behaviours including physical activity (e.g. [15]). Used in combination, BCTs and  
4  
5 motivational interviewing can target key determinants of behaviour, which can be  
6  
7 understood in terms of the individual's Capability (physical and psychological), Opportunity  
8  
9 (social and physical), and Motivation (reflective and automatic) (COM-B: [16]) to be more  
10  
11 active. The selected BCTs in this programme can be mapped onto and, therefore, target all  
12  
13 six aspects of the COM-B (17). Research has shown that the COM-B model explains a large  
14  
15 amount of variance in physical activity participation, highlighting psychological capability  
16  
17 and reflective motivation as key drivers [18]. In this work, psychological capability was  
18  
19 formed of components such as action planning and self-monitoring, and reflective  
20  
21 motivation were formed of components such as intentions and self-efficacy [18].  
22  
23  
24  
25  
26

27 The purpose of the Active Herts programme is to support engagement in physical  
28  
29 activity and promote wellbeing in inactive adults with elevated risk of CVD and/or mental  
30  
31 health concerns living in four areas of the English county of Hertfordshire where need is the  
32  
33 highest. Pragmatic delivery considerations mean the programme will use two different  
34  
35 approaches, with each being delivered in two different localities. The first will provide  
36  
37 programme users with an initial consultation, followed by 12 weeks of exercise sessions,  
38  
39 and further support in person or by phone throughout a 12-month period ('standard  
40  
41 delivery'). The second approach will include additional support in the form of optional  
42  
43 exercise buddies and free tailored exercise organised by the programme staff themselves  
44  
45 ('enhanced delivery'). The aim of this paper is to report the Active Herts programme  
46  
47 methods in terms of their content, delivery, staff training, and evaluation. The objectives of  
48  
49 the evaluation are:  
50  
51  
52  
53

54 Primary objective:

- 1  
2  
3 - To observe whether the Active Herts programme increases physical activity with  
4  
5 (enhanced delivery) and without (standard delivery) additional support from exercise  
6  
7 buddies and free access to tailored exercise classes.  
8  
9

10  
11 Secondary objectives:

- 12  
13  
14 - To observe whether the Active Herts programme increases health and mental well-  
15  
16 being with (enhanced delivery) and without (standard delivery) additional support  
17  
18 from exercise buddies and tailored exercise classes.  
19  
20  
21 - To explore the relative cost-effectiveness of the two delivery approaches.  
22  
23  
24 - To explore which components from the two different delivery approaches are  
25  
26 particular drivers of their effectiveness and what the barriers may be that prevent  
27  
28 these models from achieving their potential.  
29  
30

## 31 **Methods and Analysis**

### 32 **Design**

33  
34  
35  
36  
37 This evaluation includes a qualitative process evaluation and an outcome evaluation.  
38  
39 The quantitative study will follow a longitudinal (baseline, and 3, 6 and 12 month follow-  
40  
41 ups) observational design, with comparison of the two different delivery methods employed  
42  
43 in different localities. The design of the evaluation is illustrated in Figure 1. This protocol is  
44  
45 reported according to the Transparent Reporting of Evaluations with Nonrandomized  
46  
47 Designs (TREND; [19]) guidelines and with reference to the Template for Intervention  
48  
49 Description and Replication (TIDieR; [20]) checklist.  
50  
51  
52  
53  
54

55 *Insert figure 1 about here*  
56  
57  
58  
59  
60



### Programme users

The inclusion criteria for participation in the Active Herts programme are inactive adults aged 16 and over who have one or more risk factors for CVD. Inactivity is classed as participating in less than one episode of 30 minutes of physical activity per week on a regular basis. Additional risk factors for CVD include: diabetes, hypertension, high cholesterol, obesity (BMI > 30 or BMI > 28 if one or more co-morbidities) and/or smoking. Programme users who are inactive with a mild to moderate mental health condition may also take part. Those with a severe mental health condition can do so if their general practitioner (GP), Mind (a mental health charity), or Improving Access to Psychological Therapies (IAPT) consultant deems them suitable for the programme. An additional criterion for inclusion in the evaluation was the ability to give informed consent for their data to be used.

Eligible adults will live in one of four Hertfordshire districts (Broxbourne, Stevenage, Hertsmere, and Watford). The wider economic value for health from sport participation in Hertfordshire is £461.6 million. Inactivity (excluding costs related to obesity and mental health) is also costing the health economy between £1.1 and £1.4 million per year in the four focus districts of Active Herts. The districts contain the highest number of deprived Lower Super Output Areas (LSOA) in Hertfordshire and are in the five highest rates of under 75 mortality rate from CVD (2-3%), adult obesity (8-10%), and diabetes (4-6%). A life expectancy gap of 6-9.6 years exists between the most and least deprived areas across these districts [21]. Less than 50% of this population participate in 30 minutes of physical activity once per week.

1  
2  
3 Programme users will be primarily recruited into the programme through 23 GP  
4  
5 services throughout the four localities: five in Broxbourne; five in Hertsmere; seven in  
6  
7 Stevenage; six in Watford. A Mind wellbeing centre in each location will also refer into the  
8  
9 programme. Hertfordshire residents who meet the inclusion criteria can also access the  
10  
11 programme through self-referral. As this programme is Sport England and local authority  
12  
13 funded with a focus on delivery, power calculations were not deemed necessary and all  
14  
15 eligible programme users are invited to engage in the evaluation. The objective is to provide  
16  
17 as many eligible residents as possible with access to this programme over the three-year life  
18  
19 of the project, with a minimum expectation of engagement from 1500 programme users.  
20  
21  
22  
23

#### 24 25 **Programme and Evaluation Materials and Procedure** 26

27  
28 The content of the Active Herts programme has been based on the review [11-12]  
29  
30 discussed to include BCTs found to be present in effective physical activity interventions,  
31  
32 with the exception of 'Biofeedback' as giving each participant heart rate monitors in a  
33  
34 programme of this size is unfeasible. Many of the BCTs are included in the booklet given to  
35  
36 programme users used by 'Get Active Specialists' during their consultations with  
37  
38 programme users, and target all six facets of the COM-B model of behaviour change ([17],  
39  
40 see Table 1). Programme users in both delivery groups will receive the same content in  
41  
42 terms of an initial 45 minute consultation with a Get Active Specialist (with additional  
43  
44 consultations at 3, 6, and 12 months), an Active Herts booklet, a two week booster call, and  
45  
46 access to activities in their local area. All programme contacts in person and by phone will  
47  
48 be on a one-to-one basis. Aside from access to a range of free group activity sessions over  
49  
50 the first 12 weeks, there are no additional incentives for programme users to attend  
51  
52 consultation  
53  
54  
55  
56  
57  
58  
59  
60

1  
2  
3  
4  
5  
6  
7  
8  
9  
10  
11  
12  
13  
14  
15  
16  
17  
18  
19  
20  
21  
22  
23  
24  
25  
26  
27  
28  
29  
30  
31  
32  
33  
34  
35  
36  
37  
38  
39  
40  
41  
42  
43  
44  
45  
46  
47  
48  
49  
50  
51  
52  
53  
54  
55  
56  
57  
58  
59  
60

*Insert Table 1 about here*

### **Get Active Specialists**

One Get Active Specialist has been employed in each of the four localities for the three-year duration of the programme. The specialists will work with local GPs and Mind centres to recruit eligible programme users. The specialists all have a minimum of level 3 Register of Exercise Professional and GP Exercise Referral qualifications. The Get Active Specialists will be further trained so that conversations with programme users can be user-led, involving open-ended questions, which allow programme users to take ownership of setting their own goals, plans, and rewards for progress. Consequently, the specialists will receive the following training specific to this programme:

- The two day 'British Heart Foundation: Promoting health behaviour change – A solution focused approach' course (<http://www.bhfactive.org.uk/training-and-events-item/506/index.html>)
- The three day 'The Wright Foundation: Obesity and Diabetes' course ([http://www.wrightfoundation.com/spec\\_ob\\_di.php](http://www.wrightfoundation.com/spec_ob_di.php))
- The one day 'The Wright Foundation: Level 4 mental health' course ([http://www.wrightfoundation.com/spec\\_men.php](http://www.wrightfoundation.com/spec_men.php))
- A two-day workshop, followed by quarterly one-day boosters, on motivational interviewing, health coaching, and behaviour change led by a Chartered Sport and Exercise and Health Psychologist and Research Fellow (AC, NH).

The two Specialists working in the localities with the potential to provide exercise buddies will also attend a one day Recruiting and Retaining Volunteer course organised by Volunteer

1  
2  
3 Centres, Hertfordshire (<http://www.volunteeringherts.org.uk/index.php/events/details/12->  
4  
5 recruiting-and-retaining-volunteers).  
6  
7

### 8 9 **Assessment of Fidelity**

10  
11 To ensure fidelity of programme delivery, a number of measures will be put in place.  
12  
13 Get Active Specialists (GAS) will record a random sample of consultations and review the  
14  
15 audio amongst themselves, project lead and at quarterly booster sessions with the trainers.  
16  
17 The specialists will score each consultation with the Motivational Interviewing Treatment  
18  
19 Integrity coding scheme (MITI; [22]) and a checklist of BCTs. The MITI will score the  
20  
21 specialists on five domains core to motivational interviewing: Evocation – the GAS works  
22  
23 proactively to evoke participant’s own reasons for change; Collaboration – the GAS actively  
24  
25 fosters and encourages power sharing in the interaction; Autonomy/Support – The GAS  
26  
27 adds significantly to the feeling and meaning of participant’s expression of autonomy;  
28  
29 Direction – The GAS resists the righting reflex, yet generally does not miss opportunities to  
30  
31 direct participant toward the target behaviour; Empathy – The GAS shows evidence of deep  
32  
33 understanding of participant’s point of view. Every three months throughout the duration of  
34  
35 the evaluation, the GAS and project lead will meet for booster sessions with a Chartered  
36  
37 Sport and Exercise and Health Psychologist and Research Fellow (AC, NH) to review  
38  
39 recorded consultations, recap training, discuss any barriers to successful delivery, and  
40  
41 highlight what is working well.  
42  
43  
44  
45  
46  
47  
48  
49

### 50 51 **Outcome Measures**

#### 52 53 *Primary outcomes:*

54  
55 Physical activity will be measured with the International Physical Activity  
56  
57 Questionnaire (IPAQ; [23]). Six questions will assess the level of vigorous and moderate-  
58  
59  
60

1  
2  
3 intensity physical activity, and walking of each participant over the last week by asking the  
4  
5 amount of time spent being active and on how many days for each, with the minimum being  
6  
7 10 minutes at a time. The IPAQ allows a Metabolic Equivalent of Task (MET) score to be  
8  
9 calculated for each activity type by weighting its energy requirements, with 3.3 METs for  
10  
11 walking, 4 METs for moderate-intensity activity, and 8 METs for vigorous-intensity activity. A  
12  
13 total activity MET score can then be calculated accounting for intensity [24]. The IPAQ also  
14  
15 asks one question about how much time is spent sitting on a weekday over the last seven  
16  
17 days. An additional two questions will ask about sporting participation over the last week by  
18  
19 asking the amount of time spent doing sports and on how many days, with the minimum  
20  
21 being 10 minutes at a time.  
22  
23  
24  
25

#### 26 27 *Secondary outcomes:*

28  
29 Mental well-being will be measured using the Warwick Edinburgh Mental Well-being  
30  
31 Scale (WEMWBS; [25]), a 14-item scale exploring thoughts and feelings over the last two  
32  
33 weeks. Programme users are presented with items such as 'I've been feeling useful' or 'I've  
34  
35 been thinking clearly' and must rate themselves on a scale from 1 '*None of the time*' to 5 '*All*  
36  
37 *of the time*'.  
38  
39

40  
41 Perceptions of health will be measured using the Euroqual EQ-5D-5L [26], which has  
42  
43 five domains focusing on mobility, self-care, usual activities, pain/discomfort, and  
44  
45 anxiety/depression, with one question per domain. Each question has five options to choose  
46  
47 from ranging of no problems to inability to function. An additional question also asks how  
48  
49 good or bad programme users perceive their health to be on a scale ranging from 0 (*the*  
50  
51 *worst health you can imagine*) to 100 (*the best health you can imagine*).  
52  
53  
54

#### 55 *COM-B measures*

56  
57  
58  
59  
60

1  
2  
3 All of the COM-B related scales were validated in a previous study [18] and produce  
4 a mean score apart for self-efficacy which produces a total score. Self-monitoring will be  
5 measured by two items, which ask programme users to rate how much they agree with  
6 statements such as 'I constantly monitored myself whether I exercise frequently enough' on  
7 a scale from 1 'Completely disagree' to 4 'Totally agree', retrospectively over the past week  
8 [24].  
9

10  
11  
12 Action Planning will be measured by four items about when, where, how, and how  
13 often programme users make detailed plans regarding physical activity on a scale from 1  
14 'Completely disagree' to 4 'Totally agree', retrospectively over the past week [28].  
15

16  
17  
18 Self-efficacy will be measured with the Physical Exercise Self-Efficacy Scale [29],  
19 which consists of five items exploring programme users' ability to carry out their  
20 behavioural intentions in the face of challenges, such as 'even when I feel tense'. The items  
21 will be measured on a scale from 1 (*Very uncertain*) to 4 (*Very certain*).  
22

23  
24  
25 Intentions will be measured using three items [30], each referring to the amount of  
26 physical activity the individual intends to do over the next week with statements such as 'I  
27 expect to take part in regular physical activity over the next week'. Each item is rated on a 7-  
28 point scale from 1 (*Strongly disagree*) to 7 (*Strongly agree*).  
29

30  
31  
32 Attitudes will be measured using four items [30], each referring to the participant's  
33 attitudes towards physical activity in terms of how harmful, healthy, enjoyable, and boring  
34 they view it on a set of 7-point scales anchored by positive and negative views (e.g. 1 = *Very*  
35 *unhealthy* to 7 = *Very healthy*).  
36

## 37 38 39 40 41 42 43 44 45 46 47 48 49 50 51 52 53 **Analytical Methods**

### 54 55 56 57 58 59 60 *Outcomes evaluation*

1  
2  
3 The outcomes evaluation will be based on a comparison between recorded values at  
4  
5 baseline for the primary and secondary outcomes and those captured at the various follow-  
6  
7 up points. The association between exposure to the programme and changes in the primary  
8  
9 and secondary outcomes between baseline and post-participation will be examined using  
10  
11 repeated measures multiple regression models, with covariates including follow-up time  
12  
13 point, and whether each participant is in a 'standard delivery' or 'enhanced delivery' area.  
14  
15 An interaction term will be fitted to identify if trends in outcomes by follow-up point differ  
16  
17 between the two area types. Differences in baseline characteristics of programme users  
18  
19 between the 'standard' and 'enhanced' delivery areas will be tested using either an  
20  
21 Independent Samples T-test or a Mann-Whitney U test depending on whether the variable  
22  
23 being tested follows a normal distribution. Any potential confounding factors associated  
24  
25 with variant characteristics of the two sets of programme users will be adjusted for by  
26  
27 inclusion as covariates in the models. If changes in the primary outcome are found,  
28  
29 additional regression models will explore whether these changes are driven by changes in  
30  
31 COM-B-related measures.  
32  
33  
34  
35  
36  
37  
38

39 Loss to follow-up is a common problem in this form of evaluation and the sample of  
40  
41 programme users providing data at all follow-up points is likely to differ from those with  
42  
43 lower engagement in the evaluation. Depending on the degree of loss to follow-up, a  
44  
45 complete case analysis will be undertaken and the results compared with an analysis of all  
46  
47 data available, whereby simple mean imputation will be used in the case of missing values.  
48  
49 Should the results from the two models show substantial variation, then multiple  
50  
51 imputation techniques will be employed.  
52  
53  
54

55  
56  
57 *Process evaluation*  
58  
59  
60

1  
2  
3 A process evaluation is a systematic method of collecting, analysing, and using  
4  
5 information to understand the functioning of a programme or intervention by examining  
6  
7 implementation, mechanisms of impact, and contextual factors [31]. A process evaluation of  
8  
9 Active Herts will take place in three phases with each phase exploring a different theme.  
10  
11 Data will be collected in the form of one-to-one interviews with stakeholders, group  
12  
13 interviews with the Get Active Specialists, and focus groups with programme users.  
14  
15 Stakeholders interviewed will include commissioners, higher programme management,  
16  
17 project delivery partners, and health service practitioners.  
18  
19  
20  
21

22  
23 The initial phase will focus on areas related to the set-up of Active Herts, including  
24  
25 developments in the method of recruitment or delivery of the programme, barriers and  
26  
27 facilitators to reaching the target audience, partnership working, and engagement with  
28  
29 primary and secondary care. The second phase will explore deviations in the programme  
30  
31 delivery from those planned, potential mechanisms by which the programme works, and  
32  
33 external factors which may influence the programme. A final phase will take on a reflective  
34  
35 focus looking back over the programme and considering what worked well and what did  
36  
37 not, identifying examples of best practice. It will also consider the future sustainability of  
38  
39 Active Herts including exit routes for programme users and continuation of the programme  
40  
41 where appropriate. In all phases, other emerging themes will be explored as identified  
42  
43 during the process.  
44  
45  
46  
47

#### 48 49 *Economic evaluation*

50  
51 The economic evaluation will examine the costs of delivery of the Active Herts  
52  
53 programme against the benefits gained in terms of reduced risk of morbidity from a range  
54  
55 of chronic conditions, the risk of which is associated with physical inactivity. The ratio of  
56  
57  
58  
59  
60



1  
2  
3 costs to effects – i.e. “the incremental cost-effectiveness ratio” (ICER) will be assessed  
4  
5 against a “cost-effectiveness threshold”, representing the opportunity cost of spending the  
6  
7 money. In the UK, the National Institute for Health and Care Excellence (NICE) uses a  
8  
9 threshold range of £20,000–30,000; if interventions are within this area of cost-  
10  
11 effectiveness or below, then they are considered “cost-effective” or good “value for  
12  
13 money”.  
14  
15

16  
17  
18 This evaluation will use Version 2 (November 2016) of the Sport England MOVES  
19  
20 model, a tool for conducting economic analysis of physical activity programmes and  
21  
22 interventions developed by the Health Economics Group at the University of East Anglia.  
23  
24 The MOVES tool will be used to monetarise the reduced disease burden associated with  
25  
26 participation in Active Herts by comparing their predicted disease risk against that of a  
27  
28 similar cohort of the population not participating in any programme. The MOVES model will  
29  
30 link changes in physical activity (using increases in physical activity energy expenditure due  
31  
32 to the programme) with changes in disease prevalence over time for depression, diabetes,  
33  
34 stroke, coronary heart disease, dementia, colorectal cancer, breast cancer, and hip fracture.  
35  
36 The model then assesses the financial return to the NHS (treatment costs saved) and the  
37  
38 health impacts (Quality Adjusted Life Years (QALYs) gained) in the ‘enhanced delivery’  
39  
40 compared with the ‘standard delivery’ area, which are used to calculate indicators of cost  
41  
42 effectiveness; the Incremental Cost Effectiveness Ratio, NHS return on Investment, and  
43  
44 QALYs return on investment.  
45  
46  
47  
48  
49  
50

### 51 52 **Ethics and Dissemination**

53  
54  
55 This study has been approved by both the Faculty of Medicine and Health Sciences  
56  
57 Research Ethics Committee at University of East Anglia (Ref: 20152016 – 28) and by the  
58  
59  
60

1  
2  
3 University of Hertfordshire Health and Human Science Ethics Committee with Delegated  
4 Authority (protocol number: LMS/PGR/UH/02427). All programme users will be provided  
5  
6  
7 with a Participant Information and Consent Form. Informed written consent will be obtained  
8  
9  
10 from all programme users in the evaluation. The results of this study will be published in  
11  
12 peer-reviewed journals, presented at national and international conferences, and shared  
13  
14 through the study website, and local public health and community sport partnership forums  
15  
16 and newsletters.  
17  
18  
19

## 20 Discussion

21  
22  
23 Inactivity is a major issue in England with large health and economic burdens  
24 associated with not participating in the recommended amount of activity. This programme  
25  
26 targets inactive adults with additional health problems in areas that would benefit the most  
27  
28 from a community physical activity programme. Pragmatic considerations mean that the  
29  
30 form of programme delivery differs across programme areas, providing a comparison in the  
31  
32 form of a natural experiment. Active Herts incorporates the latest evidence of the BCTs that  
33  
34 work both during the participation in the programme and over the longer term to aid  
35  
36 sustainable behaviour change. These evidence-based techniques will be combined with an  
37  
38 effective delivery approach in motivational interviewing and health coaching that allow  
39  
40 discussions to be participant-led so that the programme users take ownership over their  
41  
42 goals, progress, and rewards. Additionally, this evaluation will measure key drivers of  
43  
44 physical activity from the most up to date behaviour change theory (COM-B), allowing  
45  
46 evaluation of not only whether physical activity has increased but why. This will provide the  
47  
48 basis with which to refine a scalable intervention that could be more robustly tested in a  
49  
50 randomised controlled trial.  
51  
52  
53  
54  
55  
56  
57  
58  
59  
60

## Declarations

### *Acknowledgements*

The authors would like to thank Adan Freeman and Joe Capon the project officers, and Fiona Deans, the project manager from Herts Sports Partnership, and the public health lead, Piers Simey, from Hertfordshire County Council. We would also like to thank the Get Active Specialists (Lee Bruce, Alison Goodchild, Hannah Marsh, and Andrew Rix)

### *Authors' contributions*

NH prepared the draft versions and final manuscript. AC read and provided feedback on the drafts, and approved the final manuscript. AJ prepared the analysis and evaluation sections, read and provided feedback on the drafts, and approved the final manuscript. LB read and provided feedback on the drafts, and approved the final manuscript.

### *Funding*

This work was supported by Sport England (Ref: 2015000295), Broxbourne Borough Council, East and North Herts CCG, Herts Valley CCG, Hertfordshire Public Health, Herts Mind Network, Mind in Mid Herts, and Herts Sports Partnership.

### *Competing interests*

Nothing to declare

## References

- 1  
2  
3 1. Global Recommendations on Physical Activity for Health. World Health Organization.  
4  
5 2010 [http://www.who.int/dietphysicalactivity/factsheet\\_recommendations/en/](http://www.who.int/dietphysicalactivity/factsheet_recommendations/en/).  
6  
7 Accessed March 9 2017.  
8  
9
- 10 2. Barengo NC, Antikainen R, Borodulin K, Harald K, Jousilahti P. Leisure-time physical  
11  
12 activity reduces total and cardiovascular mortality and cardiovascular disease  
13  
14 incidence in older adults. *Am Geriatr Soc* 2016; DOI: 10.1111/jgs.14694  
15  
16
- 17 3. Bauman AE. Updating the evidence that physical activity is good for health: an  
18  
19 epidemiological review 2000–2003. *J Sci Med Sport* 2004;7(1):6-19.  
20  
21
- 22 4. Schuch FB, Vancampfort D, Richards J, Rosenbaum S, Ward PB, Stubbs B. Exercise as  
23  
24 a treatment for depression: A meta-analysis adjusting for publication bias. *J Psychiatr*  
25  
26 *Res* 2016;77:42-51.  
27  
28
- 29 5. Sporting future – First annual report. 2017  
30  
31 <https://www.gov.uk/government/publications/sporting-future-first-annual-report>  
32  
33 Accessed March 9 2017.  
34  
35
- 36 6. Statistics on Obesity, Physical Activity and Diet. Health and Social Care Information  
37  
38 Centre. 2014 [http://content.digital.nhs.uk/catalogue/PUB13648/Obes-phys-acti-](http://content.digital.nhs.uk/catalogue/PUB13648/Obes-phys-acti-diet-eng-2014-rep.pdf)  
39  
40 [diet-eng-2014-rep.pdf](http://content.digital.nhs.uk/catalogue/PUB13648/Obes-phys-acti-diet-eng-2014-rep.pdf). Accessed March 9 2017.  
41  
42
- 43 7. The Health Survey for England – 2012. Health and Social Care Information Centre  
44  
45 England. 2013 <http://content.digital.nhs.uk/catalogue/PUB13218>. Accessed March 9  
46  
47 2017.  
48  
49
- 50 8. Giles-Corti B, Donovan RJ. Socioeconomic status differences in recreational physical  
51  
52 activity levels and real and perceived access to a supportive physical environment.  
53  
54 *Prev Med* 2002;35(6):601-611.  
55  
56  
57  
58  
59  
60

- 1  
2  
3 9. Wardle J, Griffith J. Socioeconomic status and weight control practices in British  
4  
5 adults. *J Epidemiol Community Health* 2001;55(3):185-190.
- 6  
7  
8 10. Cassidy S, Chau JY, Catt M, Bauman A, Trenell MI. Cross-sectional study of diet,  
9  
10 physical activity, television viewing and sleep duration in 233 110 adults from the UK  
11  
12 Biobank; the behavioural phenotype of cardiovascular disease and type 2 diabetes.  
13  
14 *BMJ open* 2016;6(3):e010038.
- 15  
16  
17 11. Howlett N, Trivedi D, Troop N, Chater AM. *What are the most effective behaviour*  
18  
19 *change techniques to promote physical activity and/or reduce sedentary behaviour in*  
20  
21 *inactive adults? A systematic review and meta-analysis.* Manuscript submitted.
- 22  
23  
24 12. Howlett N, Trivedi D, Troop N, Chater AM. What are the most effective behaviour  
25  
26 change techniques to promote physical activity and/or reduce sedentary behaviour  
27  
28 in inactive adults? A systematic review protocol. *BMJ open* 2015;5:e008573
- 29  
30  
31 13. Michie S, Richardson M, Johnston M, Abraham C, Francis J, Hardeman W, et al. The  
32  
33 behavior change technique taxonomy (v1) of 93 hierarchically clustered techniques:  
34  
35 building an international consensus for the reporting of behavior change  
36  
37 interventions. *Ann Behav Med* 2013;46(1):81-95.
- 38  
39  
40 14. Chater AC. The power of language and emotion in specialist obesity services. *Eur*  
41  
42 *Health Psychol* 2016;18(5):184-188.
- 43  
44  
45 15. Rubak S, Sandbæk A, Lauritzen T, Christensen B. Motivational interviewing: a  
46  
47 systematic review and meta-analysis. *Br J Gen Pract* 2005;55(513):305-312.
- 48  
49  
50 16. Michie S, van Stralen MM, West R. The behaviour change wheel: a new method for  
51  
52 characterising and designing behaviour change interventions. *Implement Sci*  
53  
54 2011;6(1):42.
- 55  
56  
57  
58  
59  
60

- 1  
2  
3 17. Cane J, Richardson M, Johnston M, Ladha R, Michie S. From lists of behaviour change  
4 techniques (BCTs) to structured hierarchies: Comparison of two methods of  
5 developing a hierarchy of BCTs. *Br J Health Psychol* 2015;20:130-150.  
6  
7  
8  
9  
10 18. Howlett N, Schulz J, Trivedi D, Troop N, Chater AM. *Exploring the construct and*  
11 *predictive validity of the COM-B model for physical activity*. Manuscript submitted.  
12  
13  
14 19. Des Jarlais DC, Lyles C, Crepaz N. Improving the reporting quality of nonrandomized  
15 evaluations of behavioral and public health interventions: the TREND statement. *Am*  
16 *J Public Health* 2004;94(3):361-366.  
17  
18  
19  
20  
21 20. Hoffmann TC, Glasziou PP, Boutron I, Milne R, Perera R, Moher D, et al. Better  
22 reporting of interventions: template for intervention description and replication  
23 (TIDieR) checklist and guide *BMJ*. 2014;348:g1687.  
24  
25  
26  
27  
28  
29 21. Public health profiles. Health profile 2014. 2014  
30 <http://fingertipsreports.phe.org.uk/health-profiles/2014/e10000015.pdf>. Accessed  
31 March 9 2017.  
32  
33  
34  
35  
36 22. Moyers T, Martin T, Manuel J, Miller W, Ernst D. Revised global scales: Motivational  
37 interviewing treatment integrity 3.1.1 (MITI 3.1.1). Unpublished manuscript,  
38 University of New Mexico, Albuquerque, NM 2010.  
39  
40  
41  
42  
43 23. Booth ML, Ainsworth BE, Pratt M, Ekelund U, Yngve A, Sallis JF, Oja P. International  
44 physical activity questionnaire: 12-country reliability and validity. *Med Sci Sports*  
45 *Exerc* 2003;195(9131/03):3508-1381.  
46  
47  
48  
49  
50 24. Guidelines for data processing and analysis of the international physical activity  
51 questionnaire (IPAQ). International Physical Activity Questionnaire website. 2005  
52 <https://sites.google.com/site/theipaq/scoring-protocol>. Accessed March 9 2017.  
53  
54  
55  
56  
57  
58  
59  
60

- 1  
2  
3 25. Tennant R, Hiller L, Fishwick R, Platt S, Joseph S, Weich S, et al. The Warwick-  
4  
5 Edinburgh mental well-being scale (WEMWBS): development and UK validation.  
6  
7 Health Qual Life Outcomes 2007;5(1):63.  
8  
9  
10 26. Rabin R, Charro Fd. EQ-SD: a measure of health status from the EuroQol Group. Ann  
11  
12 Med 2001;33(5):337-343.  
13  
14 27. Sniehotta FF, Scholz U, Schwarzer R, Fuhrmann B, Kiwus U, Völler H. Long-term  
15  
16 effects of two psychological interventions on physical exercise and self-regulation  
17  
18 following coronary rehabilitation. Int J Behav Med 2005;12(4):244-255.  
19  
20  
21 28. Sniehotta FF, Schwarzer R, Scholz U, Schüz B: Action planning and coping planning  
22  
23 for long-term lifestyle change: theory and assessment. Eur J Soc Psychol  
24  
25 2005;35(4):565-576.  
26  
27  
28 29. Schwarzer R, Renner B. Health-specific self-efficacy scales. Freie Universität Berlin.  
29  
30 2009  
31  
32 [http://citeseerx.ist.psu.edu/viewdoc/download?doi=10.1.1.386.5658&rep=rep1&typ](http://citeseerx.ist.psu.edu/viewdoc/download?doi=10.1.1.386.5658&rep=rep1&type=pdf)  
33  
34 [e=pdf](http://citeseerx.ist.psu.edu/viewdoc/download?doi=10.1.1.386.5658&rep=rep1&type=pdf). Accessed March 9 2017.  
35  
36  
37 30. Francis JJ, Eccles MP, Johnston M, Walker A, Grimshaw J, Foy R, et al. Constructing  
38  
39 questionnaires based on the theory of planned behaviour. A manual for health  
40  
41 services researchers. 2004  
42  
43 <http://openaccess.city.ac.uk/1735/1/TPB%20Manual%20FINAL%20May2004.pdf>.  
44  
45  
46 Accessed March 9 2017.  
47  
48  
49 31. Bauman A, Nutbeam D. Evaluation in a nutshell: a practical guide to the evaluation of  
50  
51 health promotion programs. McGraw Hill; 2013.  
52  
53  
54  
55  
56  
57  
58  
59  
60

Figure 1: Active Herts programme design

Table 1: Programme content specified by behaviour change techniques and linked to constructs of the COM-B model.

| Programme component   | Behaviour change technique | COM-B construct targeted                              | Content                                                                                                                                                                                                                                                                                                                                                                           |
|-----------------------|----------------------------|-------------------------------------------------------|-----------------------------------------------------------------------------------------------------------------------------------------------------------------------------------------------------------------------------------------------------------------------------------------------------------------------------------------------------------------------------------|
| Booklet (both groups) | Pros and Cons              | Reflective motivation                                 | A page asking whether exercise is good for you and programme users are given two blank columns to fill out with possible advantages and disadvantages of becoming more active. They are then asked how confident they feel about becoming active on a scale of 1-10.                                                                                                              |
|                       | Problem Solving            | *Psychological capability;<br>Reflective motivation   | Programme users are asked to think about their current situation and to list the things that might be currently stopping them from being active and how they might overcome them.                                                                                                                                                                                                 |
|                       | Goal setting               | Reflective motivation                                 | Programme users are given the opportunity to set short (two weeks), medium (3 months), or long-term (12 months) goals, and then rate how confident they are of achieving each one from 1-10.                                                                                                                                                                                      |
|                       | Action planning            | Psychological capability<br>and Reflective motivation | A page allowing programme users to complete sections referring to their plans to becoming more active in terms of what they are going to do, where they are going to do it, when they are going to do it, and who they are going to do it with. A second page allows them to explore their time management by mapping out the week in terms of morning, afternoons, and evenings. |
|                       | Relapse prevention         | *Psychological capability;<br>Reflective motivation   | In contrast to the problem solving page which focuses on current problems, this page explains how even the most habitual exercisers can struggle at times. Programme users are asked to think about situations                                                                                                                                                                    |



in the future that may affect their progress and then about options to avoid or cope with these situations.

|                                                                              |                                                 |                                                                                                                                                                                                                                                                                                                                                                         |
|------------------------------------------------------------------------------|-------------------------------------------------|-------------------------------------------------------------------------------------------------------------------------------------------------------------------------------------------------------------------------------------------------------------------------------------------------------------------------------------------------------------------------|
| Self-monitoring of behaviour                                                 | Psychological capability                        | Programme users are given an exercise and activity diary to track their progress and highlight their engagement. A table contains columns for the date, activities completed, time in minutes, enjoyment level (from 1, low to 10, high), and how they felt after completing the activity. The table contains several rows so programme users can track this over time. |
| Information about health consequences: Information on emotional consequences | Psychological capability; Reflective motivation | A page summarises the health and emotional benefits of being active in a positively framed manner. For example, did you know that being active can 'help you manage high blood pressure' and 'make you feel good and improve your mental health'.                                                                                                                       |
| Instruction on how to perform the behaviour                                  | *Psychological capability                       | Programme users are given the national exercise guidelines for moderate and vigorous activity. Additionally information is given for examples of moderate and vigorous activity, how to break up long periods of sitting, how to improve balance to reduce the chance of falls, and an example of how these activities can fit into everyday life.                      |
| Self-reward                                                                  | Automatic motivation                            | Programme users are told the importance of rewarding themselves for the effort they make towards their activity goals. Examples are then given of how to reward themselves in ways that are healthy and free. For example, 'listen to music' or 'have a nice relaxing bath'. Self-reward                                                                                |

1  
2  
3  
4  
5  
6  
7  
8  
9  
10  
11  
12  
13  
14  
15  
16  
17  
18  
19  
20  
21  
22  
23  
24  
25  
26  
27  
28  
29  
30  
31  
32  
33  
34  
35  
36  
37  
38  
39  
40  
41  
42  
43  
44  
45  
46  
47  
48  
49

---

is also discussed briefly during the goal setting page when thinking about what success looks like.

---

|                            |                                                      |                                           |                                                                                                                                                                                                                                                                                                                                                                                                                                                                                                                                |
|----------------------------|------------------------------------------------------|-------------------------------------------|--------------------------------------------------------------------------------------------------------------------------------------------------------------------------------------------------------------------------------------------------------------------------------------------------------------------------------------------------------------------------------------------------------------------------------------------------------------------------------------------------------------------------------|
| Consultation (both groups) | Social support unspecified; Social support emotional | Social opportunity; Automatic motivation  | Programme users are given an initial 45 minute consultation in person one-to-one where motivational interviewing and health coaching are used to structure the session to fit participant needs, move them towards becoming more active, signposting activities and discussing goals and plans, while providing emotional support. This is then repeated in subsequent consultation meetings at 3, 6, and 12 months. The additional consultations will vary between 15-30 minutes and are optional based on participant needs. |
|                            | Credible source                                      | *Social opportunity; Automatic motivation | Expert Get Active Specialists who are trained in motivational interviewing and behaviour change, with specialist knowledge of obesity, diabetes, exercise referral, and mental health will discuss becoming more active in a favourable light with programme users.                                                                                                                                                                                                                                                            |
|                            | Verbal persuasion about capability                   | Reflective motivation                     | Programme users will set goals and the Get Active Specialists will encourage the participant's belief in their ability to fulfil those goals and make long-term change.                                                                                                                                                                                                                                                                                                                                                        |
|                            | Focus of past success                                | Reflective motivation                     | During the consultation programme users will set physical activity goals and the Get Active Specialists will discuss previous success or progress                                                                                                                                                                                                                                                                                                                                                                              |

---

|                         |                                   |                                              |                                                                                                                                       |
|-------------------------|-----------------------------------|----------------------------------------------|---------------------------------------------------------------------------------------------------------------------------------------|
| Exercise sessions (both | Instruction on how to perform the | Social opportunity; Psychological capability | Programme users can choose to attend 12 weeks of exercise classes either referred to them (standard delivery) or organised as bespoke |
|-------------------------|-----------------------------------|----------------------------------------------|---------------------------------------------------------------------------------------------------------------------------------------|

|                                     |                                                                                              |                                                                       |                                                                                                                                                                                                                                                                                                                                                                                                                                |
|-------------------------------------|----------------------------------------------------------------------------------------------|-----------------------------------------------------------------------|--------------------------------------------------------------------------------------------------------------------------------------------------------------------------------------------------------------------------------------------------------------------------------------------------------------------------------------------------------------------------------------------------------------------------------|
| groups)                             | behaviour;<br>Demonstration of the<br>behaviour;<br>Behavioural<br>practice/rehearsal        |                                                                       | sessions (enhanced delivery) by the Get Active Specialists. These will involve detailed instruction on how to perform a range of exercises (e.g. yoga, pilates, light to moderate-intensity circuit training). During these classes programme users will be given demonstrations of the correct way to perform the activities and provided with ample opportunity to practice and gain confidence in performing the exercises. |
|                                     | Graded tasks                                                                                 | Physical capability                                                   | During the exercise classes, exercise specialists will encourage programme users to start slowly and build up intensity throughout the 12 weeks.                                                                                                                                                                                                                                                                               |
| Booster call<br>(both groups)       | Social support<br>unspecified; Verbal<br>persuasion about<br>capability; Prompts<br>and cues | Social opportunity;<br>Reflective motivation;<br>Physical opportunity | Programme users receive a phone call at 2 weeks, which is approximately 5 minutes in duration prompting them to keep working towards their physical activity goals and stating that they are capable of achieving them.                                                                                                                                                                                                        |
| Test messages<br>(both groups)      | Social support<br>unspecified; Verbal<br>persuasion about<br>capability; Prompts<br>and cues | Social opportunity;<br>Reflective motivation;<br>Physical opportunity | A text message is sent to programme users at 2, 6, and 12 weeks prompting them to keep working towards their physical activity goals and stating that they are capable of achieving them.                                                                                                                                                                                                                                      |
| Exercise<br>buddies and<br>tailored | Social support<br>practical and<br>emotional                                                 | Social opportunity;<br>Automatic motivation                           | For programme users in the enhanced delivery areas, Get Active Specialists will also run and/or organise a range of exercise classes based on the preferences of programme users, where they may also be                                                                                                                                                                                                                       |

1  
2  
3  
4  
5 exercise classes  
6 (enhanced  
7 delivery only)  
8

paired with an exercise buddy to help them attend the exercise classes  
and provide emotional support if needed.

9 Note: \*denotes that a BCT was not explicitly linked to a COM-B construct in the consensus study from Cane et al. (2015), but the authors believe this BCT will impact this  
10 area.  
11  
12  
13  
14  
15  
16  
17  
18  
19  
20  
21  
22  
23  
24  
25  
26  
27  
28  
29  
30  
31  
32  
33  
34  
35  
36  
37  
38  
39  
40  
41  
42  
43  
44  
45  
46  
47  
48  
49

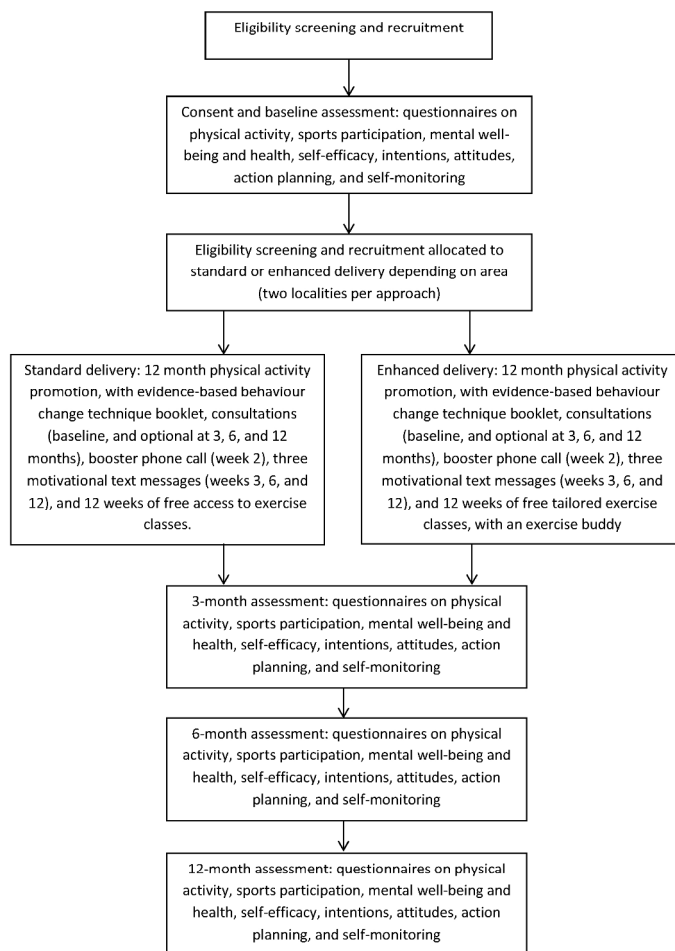

210x297mm (300 x 300 DPI)
